# Supplementary material
Source: PubMed Central journal article supplement (PMC3204006)
Supplement: NIHMS329346-supplement-1_si_001.pdf [file NIHMS329346-supplement-1_si_001.pdf]

## Histone Deacetylase Inhibitors from *Burkholderia thailandensis*

Paul Klausmeyer,<sup>†\*</sup> Suzanne Shipley,<sup>†</sup> Karina M. Zuck,<sup>†</sup> Thomas G. McCloud<sup>†</sup>

<sup>†</sup>*Natural Products Support Group, SAIC-Frederick, Inc., NCI-Frederick, Frederick, Maryland, 21702*

<sup>\*</sup>Author to whom correspondence should be addressed. Tel: (301) 228-4780

Fax: (301) 228-4361. E-mail: [klausmeyerp@mail.nih.gov](mailto:klausmeyerp@mail.nih.gov)

- S3.** HPLC dereplication of crude extract
- S4.** Fractionation diagram
- S5.** Exact mass determination of Spiruchostatin C (**2**)
- S6.** Exact mass determination of dimer of **2**
- S7.** <sup>1</sup>H NMR spectrum of **2** in CDCl<sub>3</sub>/CD<sub>3</sub>OD (9:1)
- S8.** COSY NMR spectrum of **2** in CDCl<sub>3</sub>/CD<sub>3</sub>OD (9:1)
- S9.** HSQC NMR spectrum of **2** in CDCl<sub>3</sub>/CD<sub>3</sub>OD (9:1)
- S10.** HMBC NMR spectrum of **2** in CDCl<sub>3</sub>/CD<sub>3</sub>OD (9:1)
- S11.** TOCSY NMR spectrum of **2** in CDCl<sub>3</sub>/CD<sub>3</sub>OD (9:1)
- S12.** Circular dichroism spectrum of **2** in methanol
- S13.** Circular dichroism spectrum of dimer of **2** in methanol
- S14.** Circular dichroism spectrum of FK228 (**1**) in methanol
- S15.** Assignments diagram of **2**
- S16.** Comparative HILIC HPLC of the hydrolysates of **1** and **2**
- S17.** NCI 60 data for FK228 (**1**)
- S18.** NCI 60 data for **2**
- S19.** NCI 60 for selected cell lines – **1** (upper) and **2** (lower)
- S20.** *In vivo* Hollow Fiber Results for Spiruchostatin C (**2**) and FK228 (**1**).

# S3 HPLC Dereplication

Burkholderia  
C18 Dynamax 60A, 8uM, 60A, 250X21 mm, T=ambient  
ACN-H2O, 0-5=(30:70), 25=(50:50), 45-60=(100:0), 15mL/min

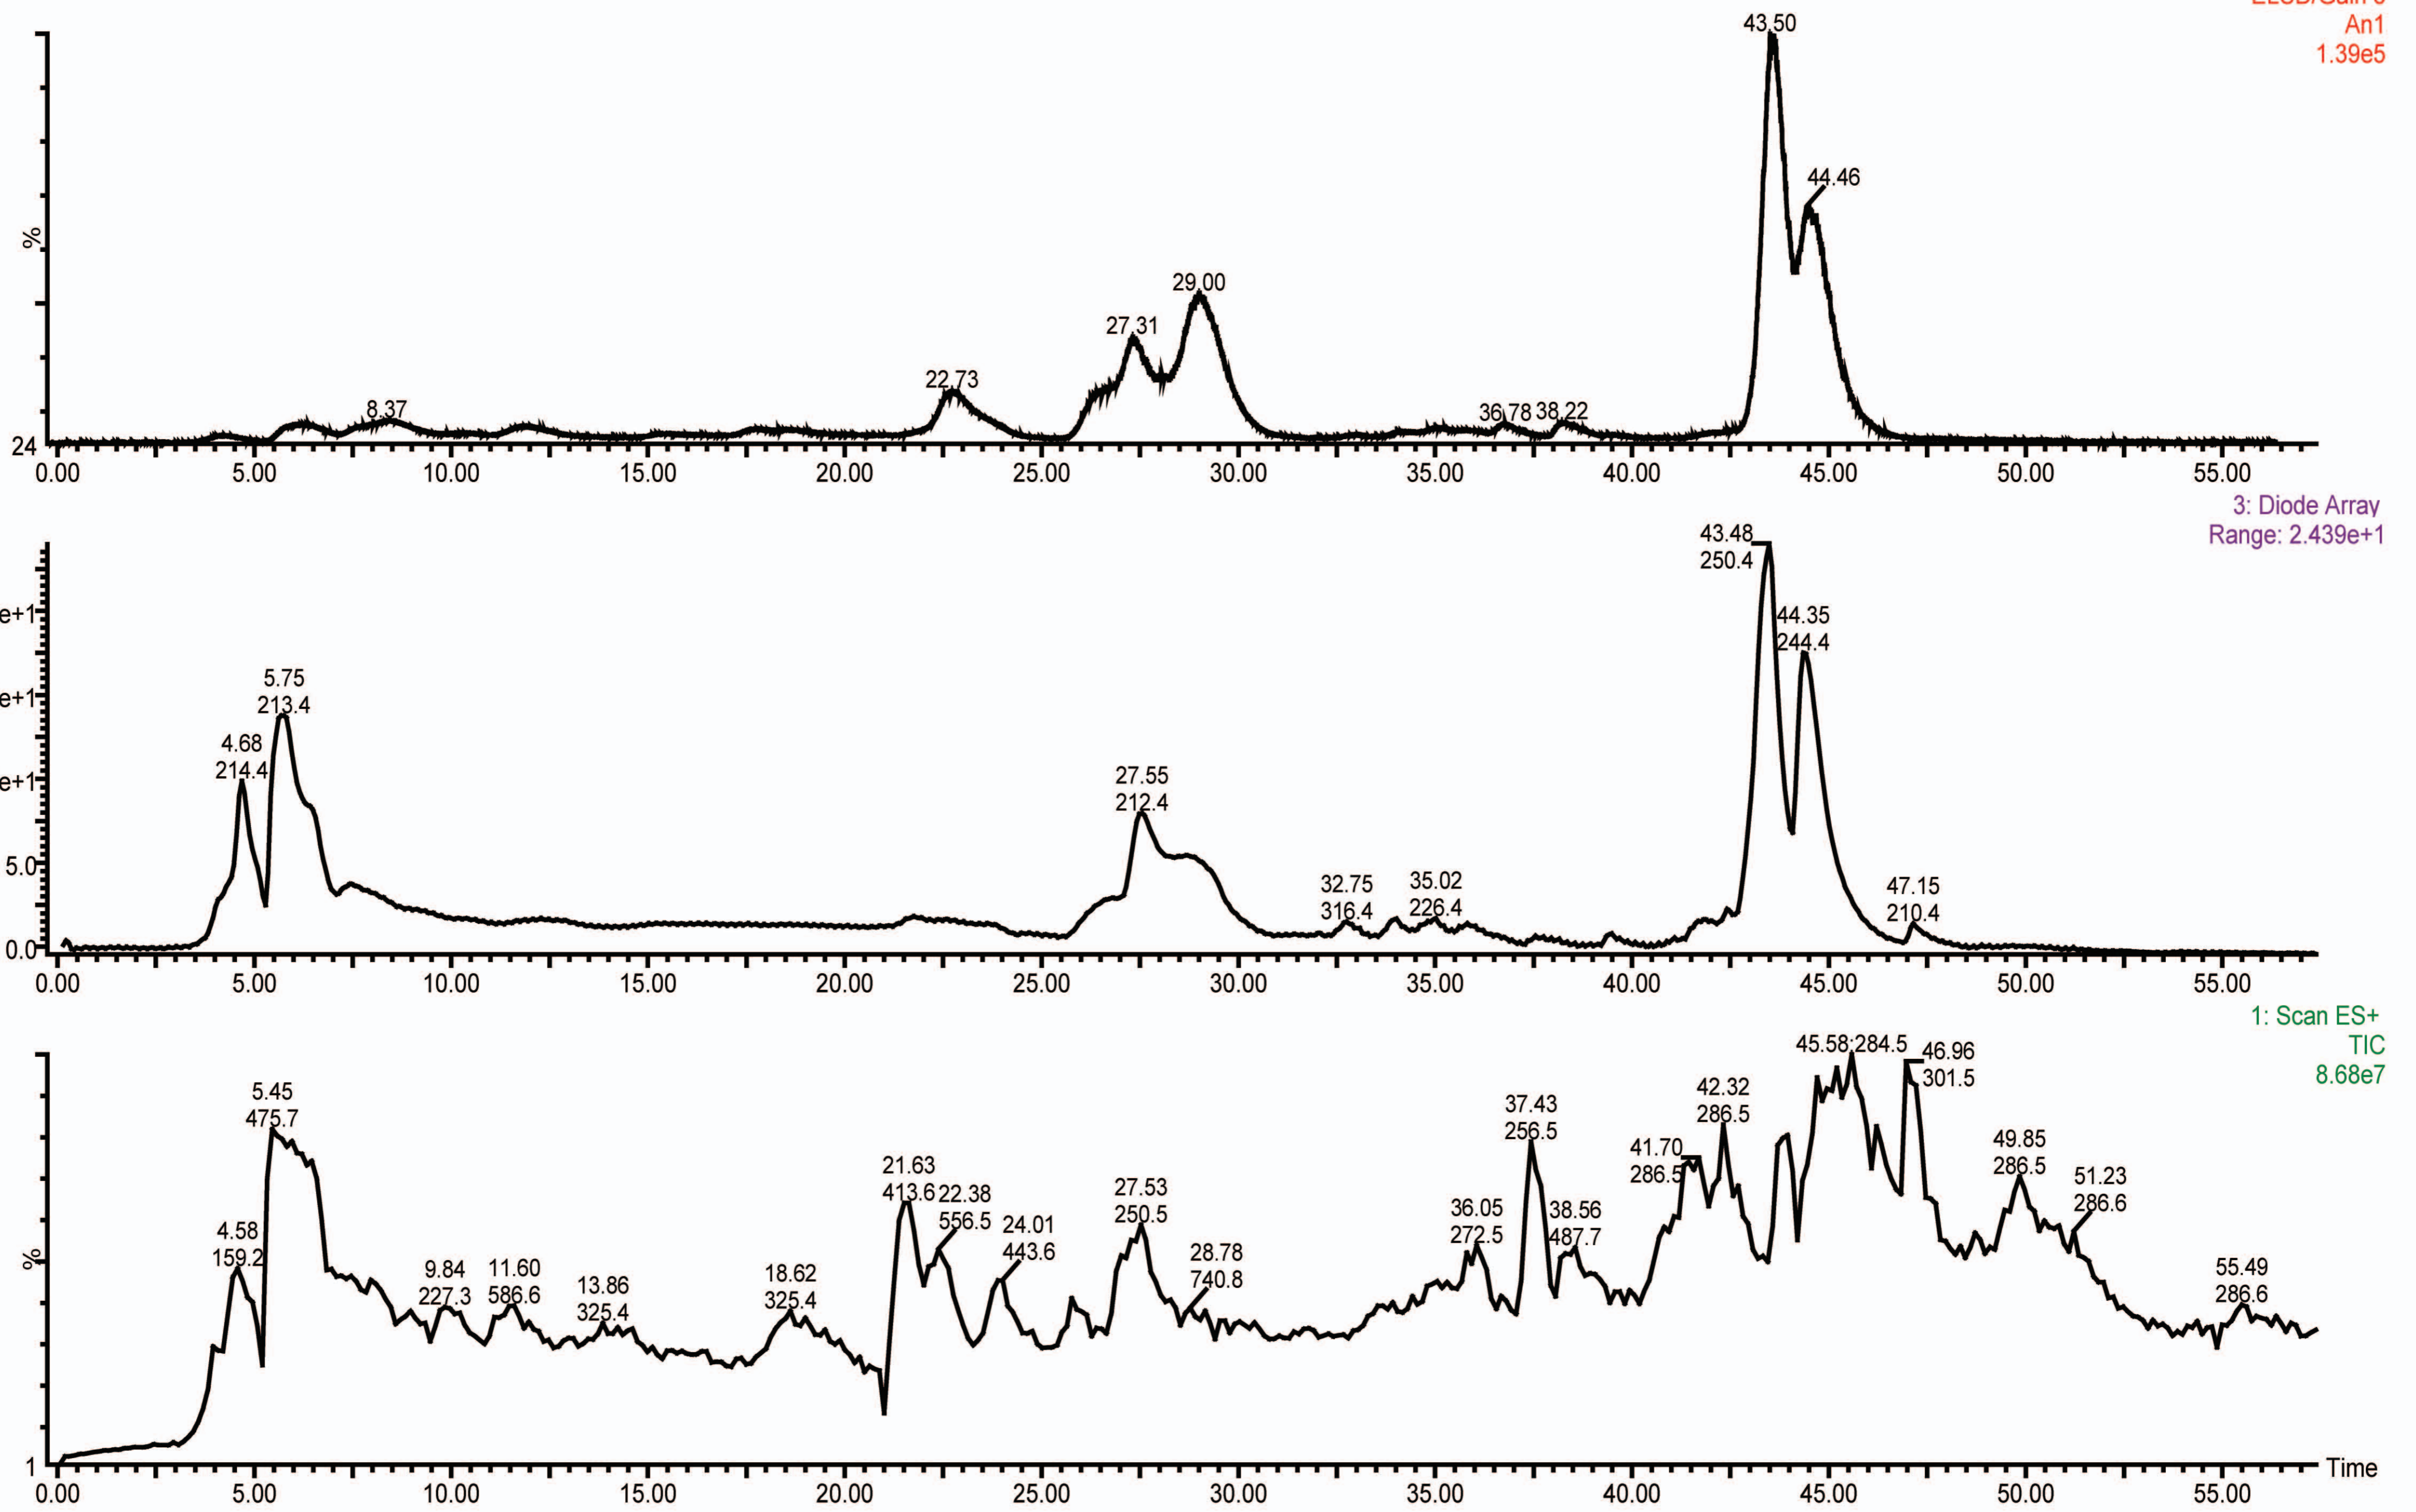

## COLO 205

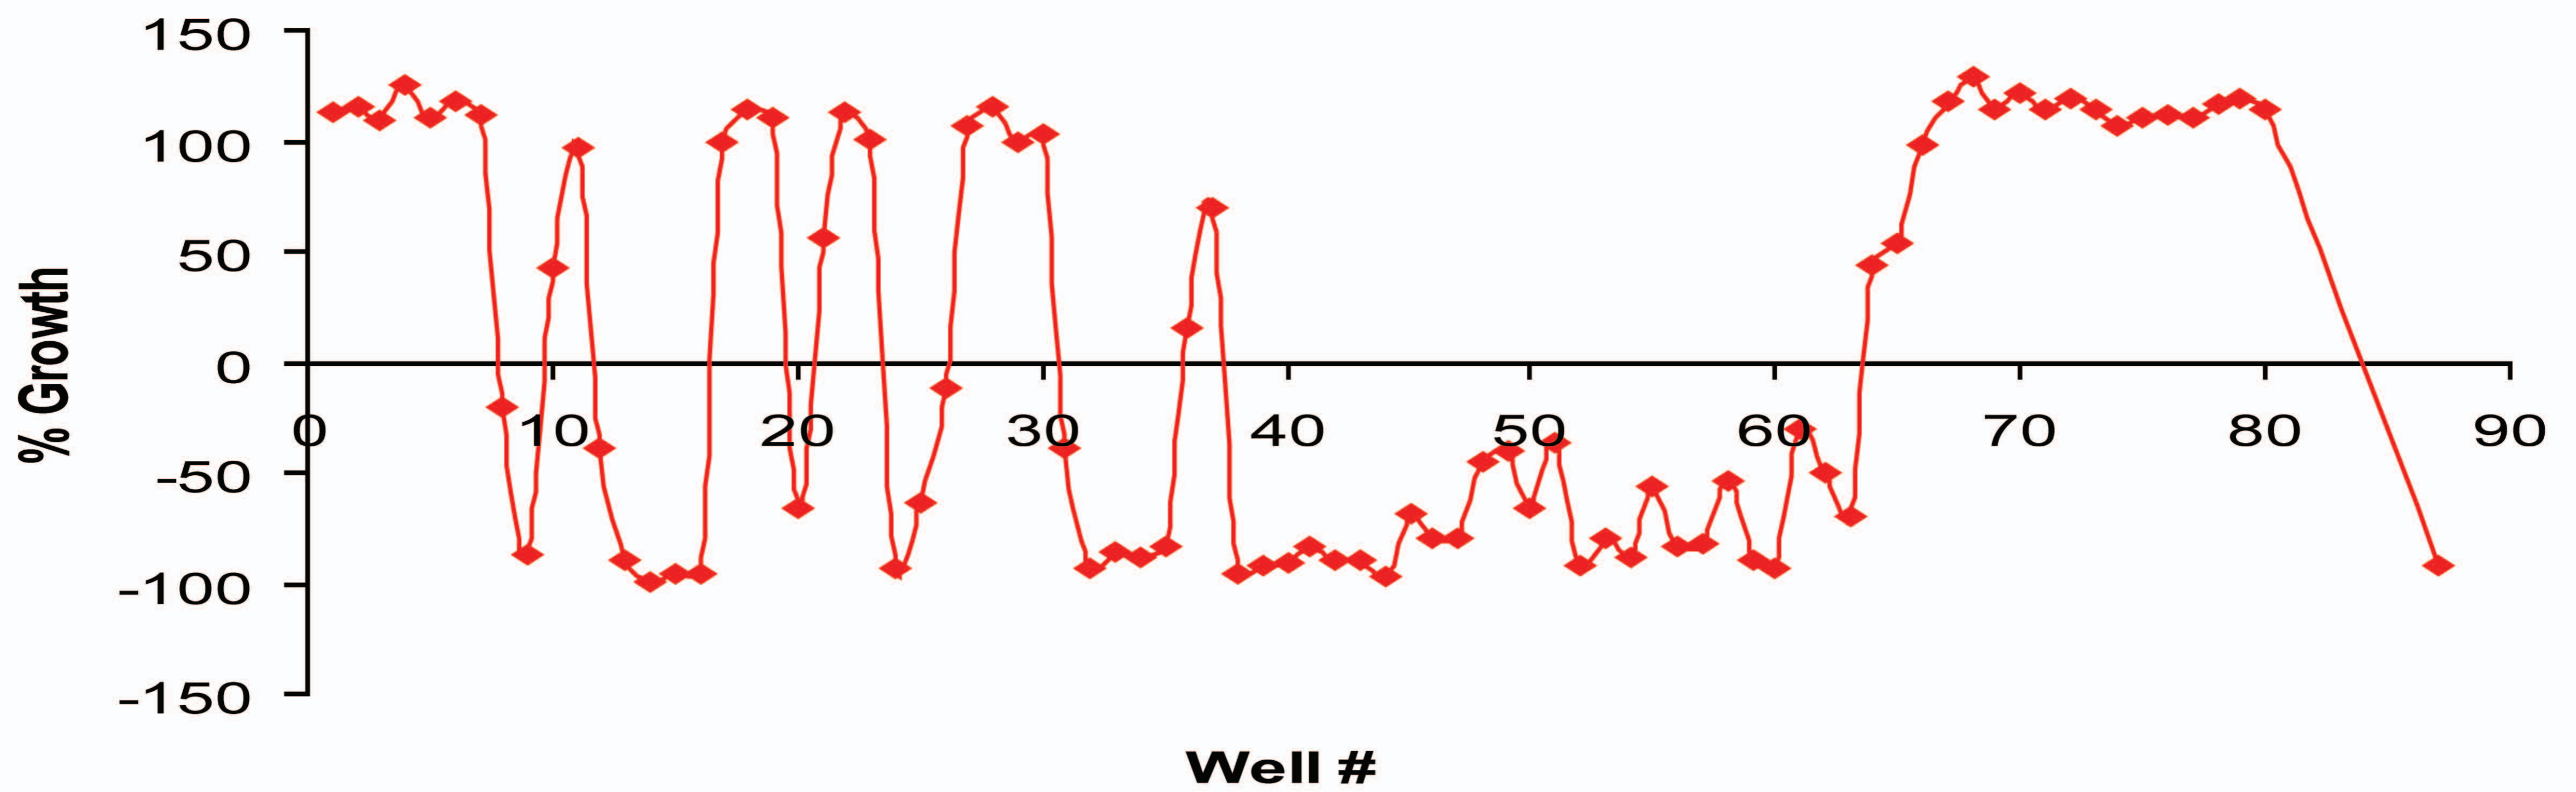

# S4. Fractionation Diagram

0G0S6418  
*Burkholderia thailandensis*  
Combine 5 EtOAc. extracts  
F244689,91,93,95,773

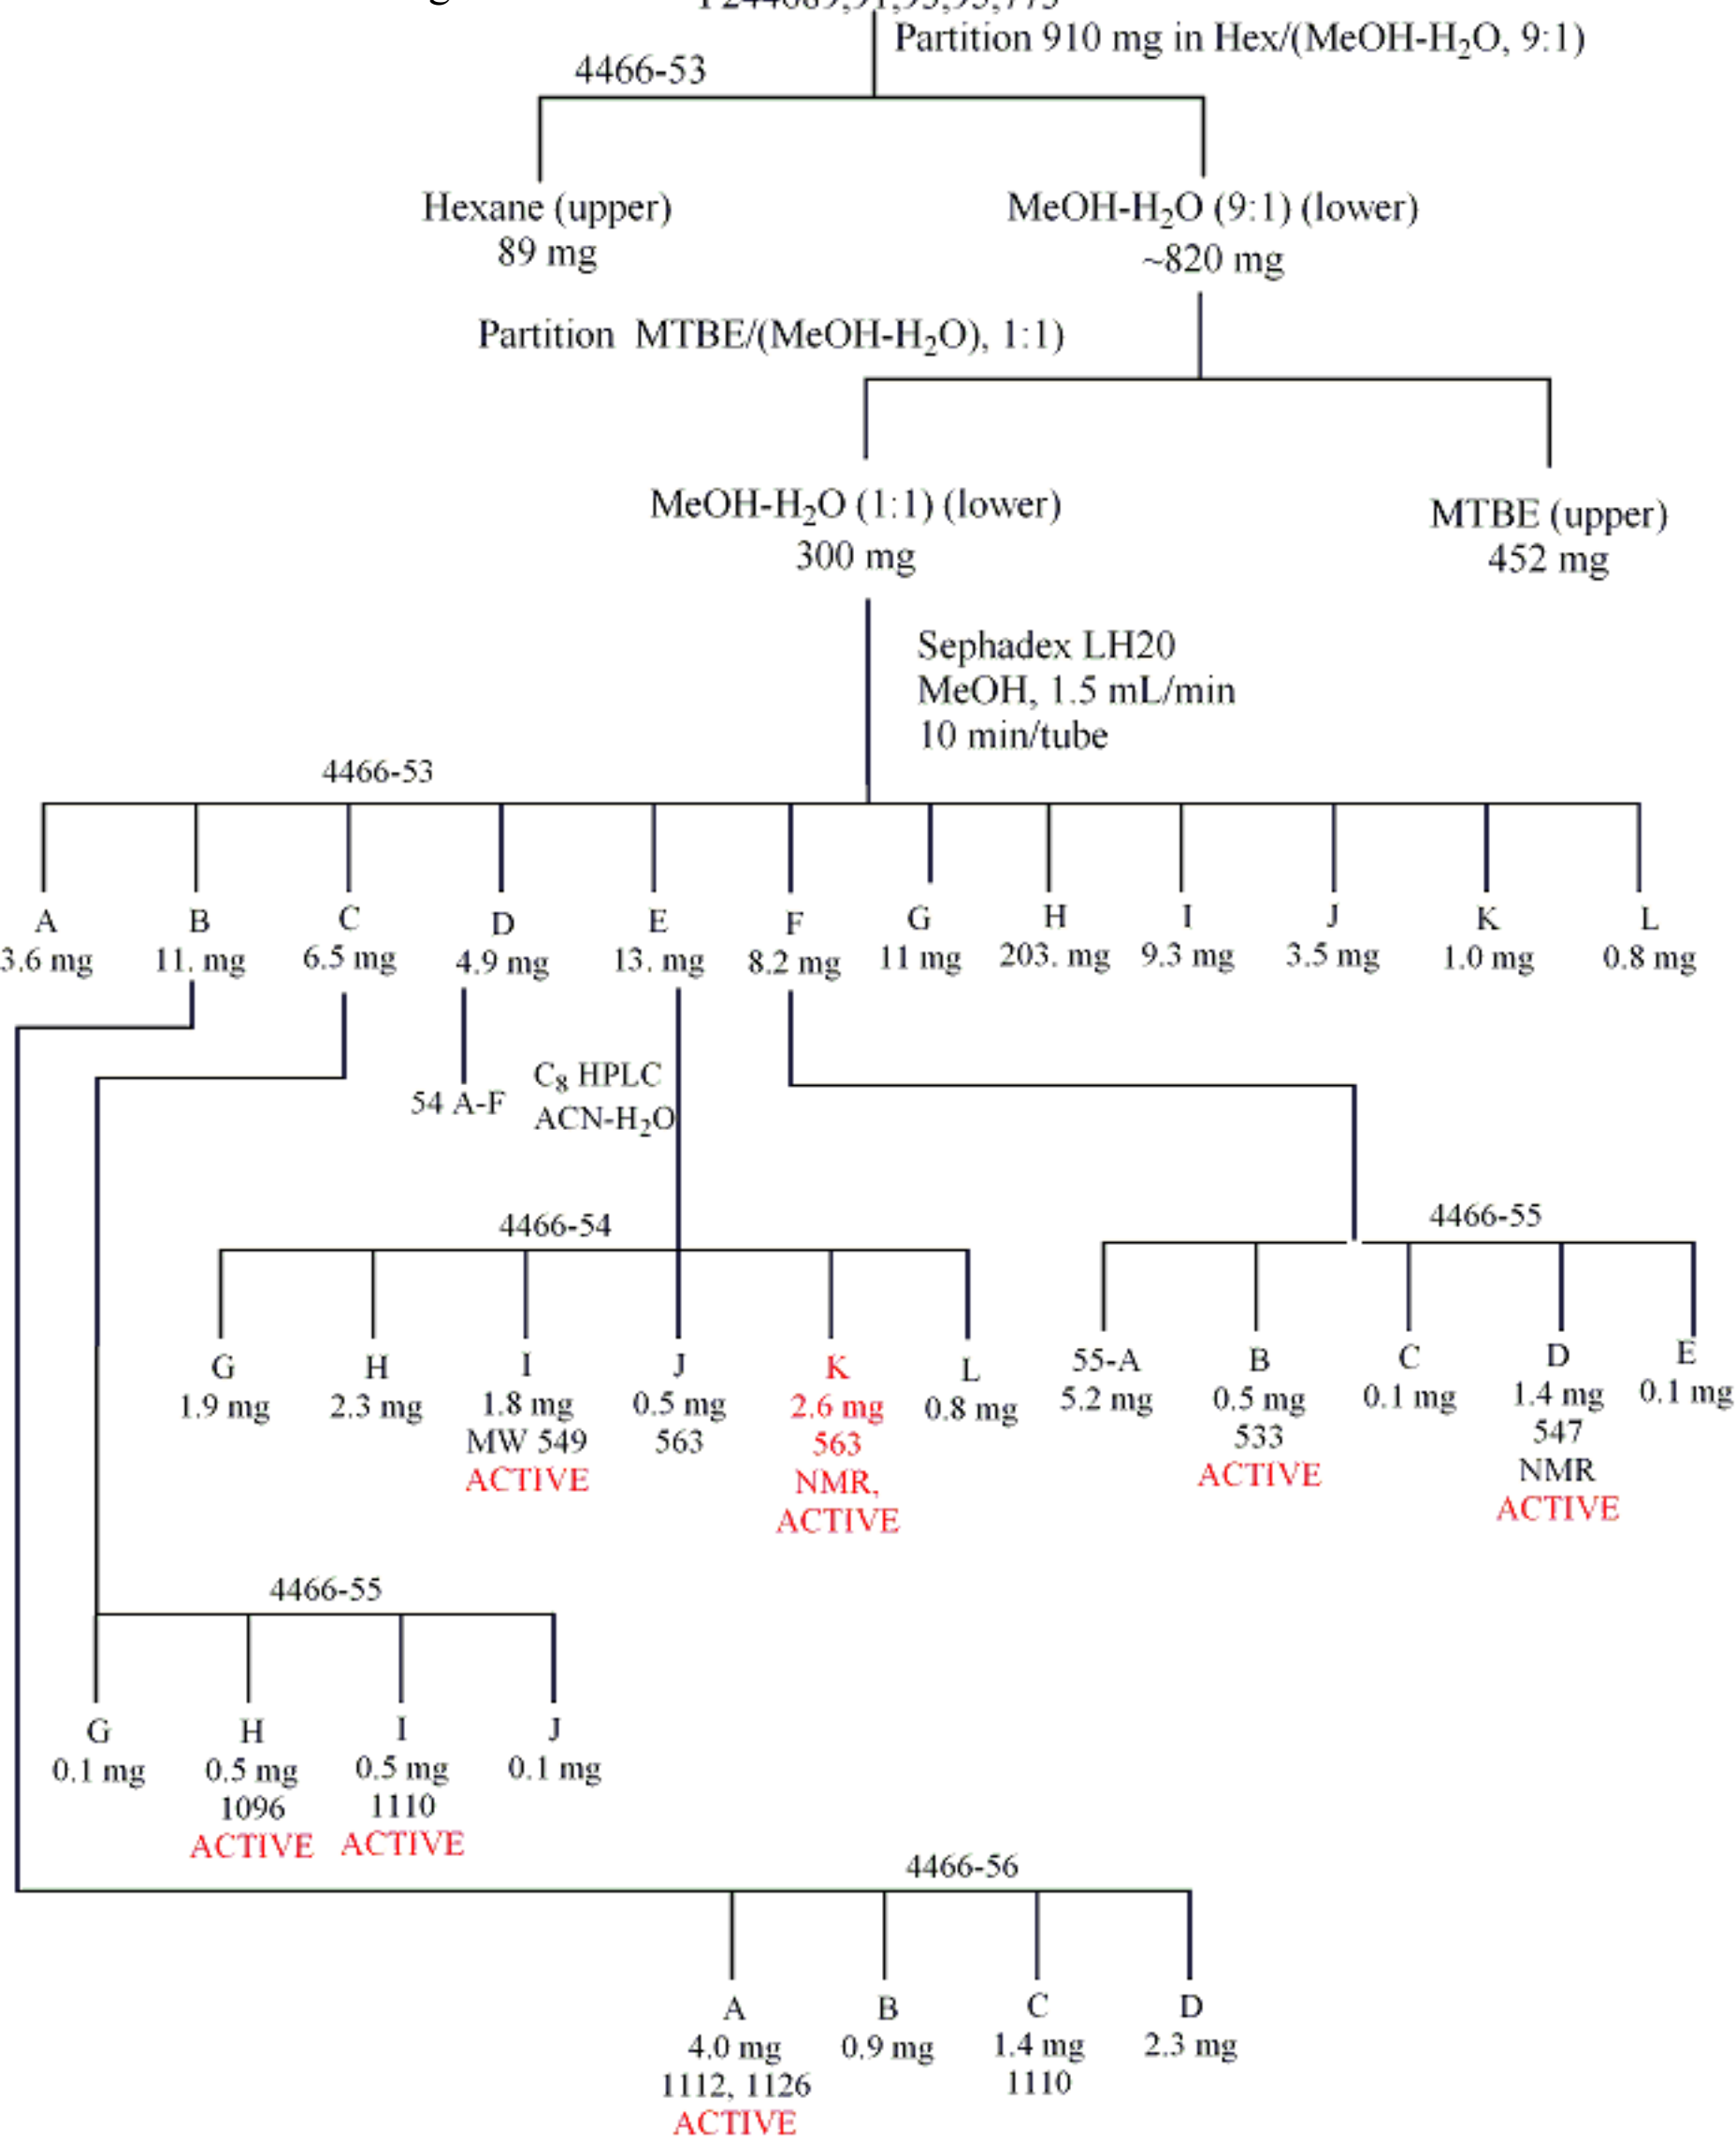

S5. Exact Mass Determination,  
cmpd 2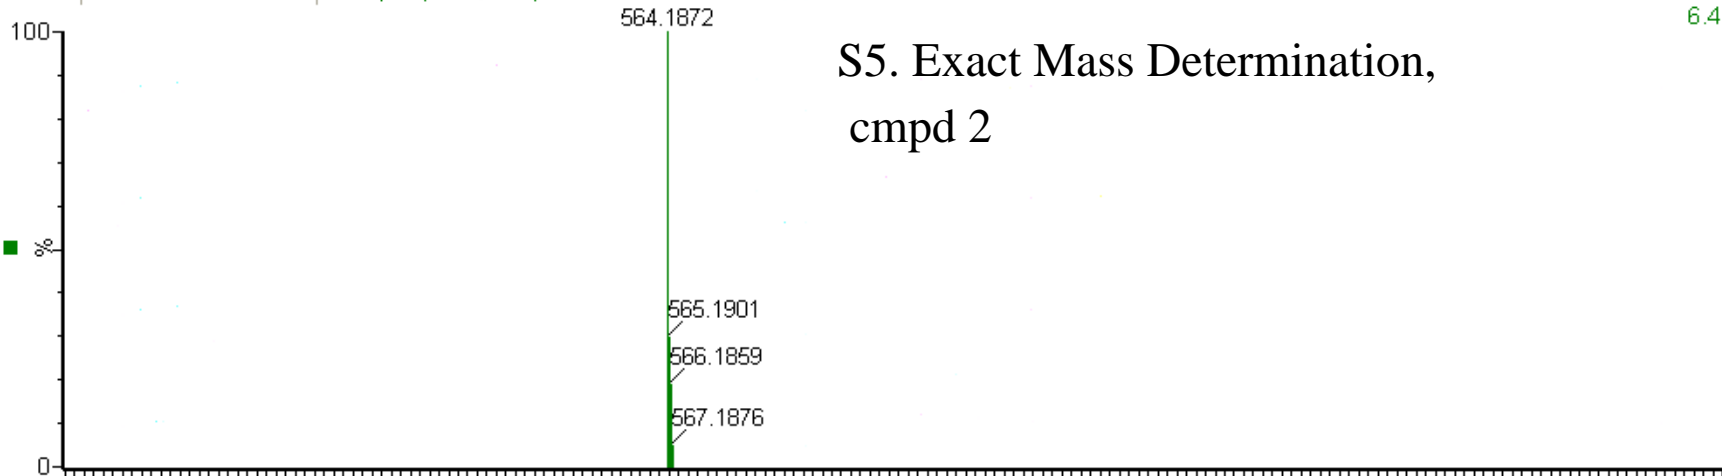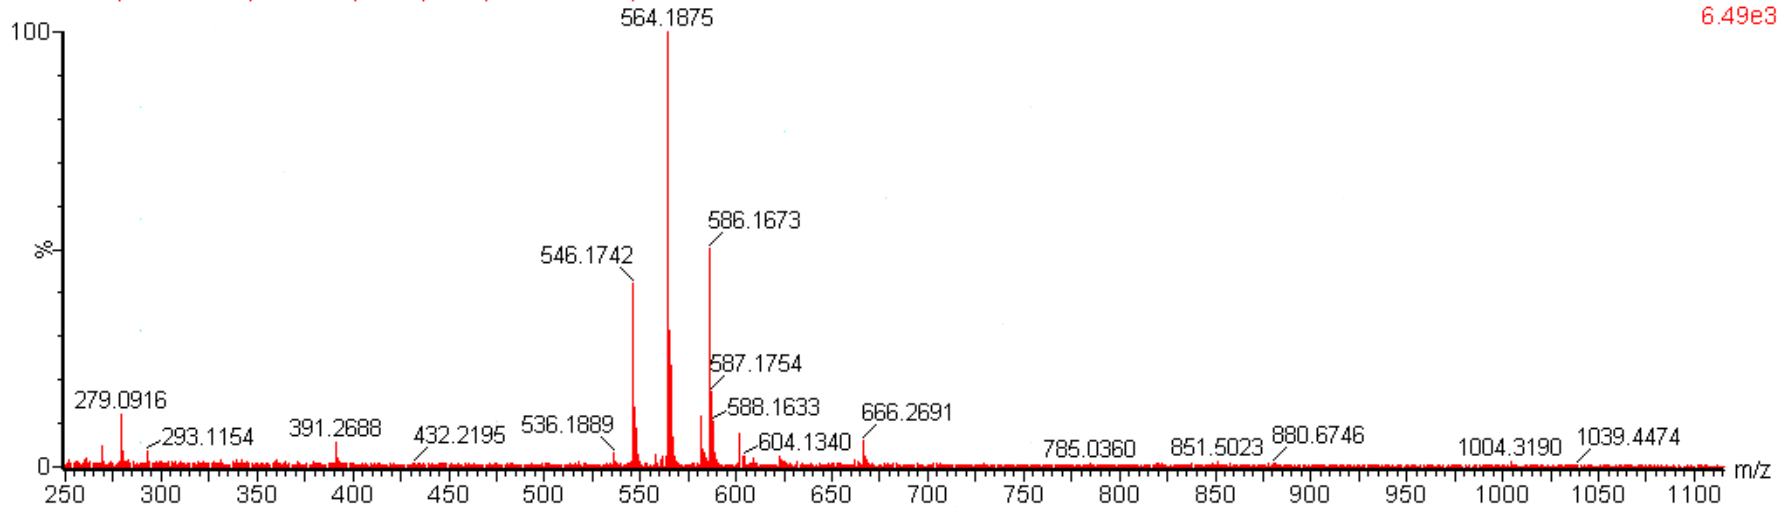

ACN-H<sub>2</sub>O w/0.1% FA, 0-1=(1:9), 5=(3:7), 7-8=(9:1), 8.2-9=(1:9), 0.75 mL/min

4473-4-D (11 17 2010) T1 (0.018) Is (1.00,1.00) C<sub>46</sub>H<sub>74</sub>N<sub>6</sub>O<sub>14</sub>S<sub>6</sub>

1: TOF MS ES+  
4.14e12

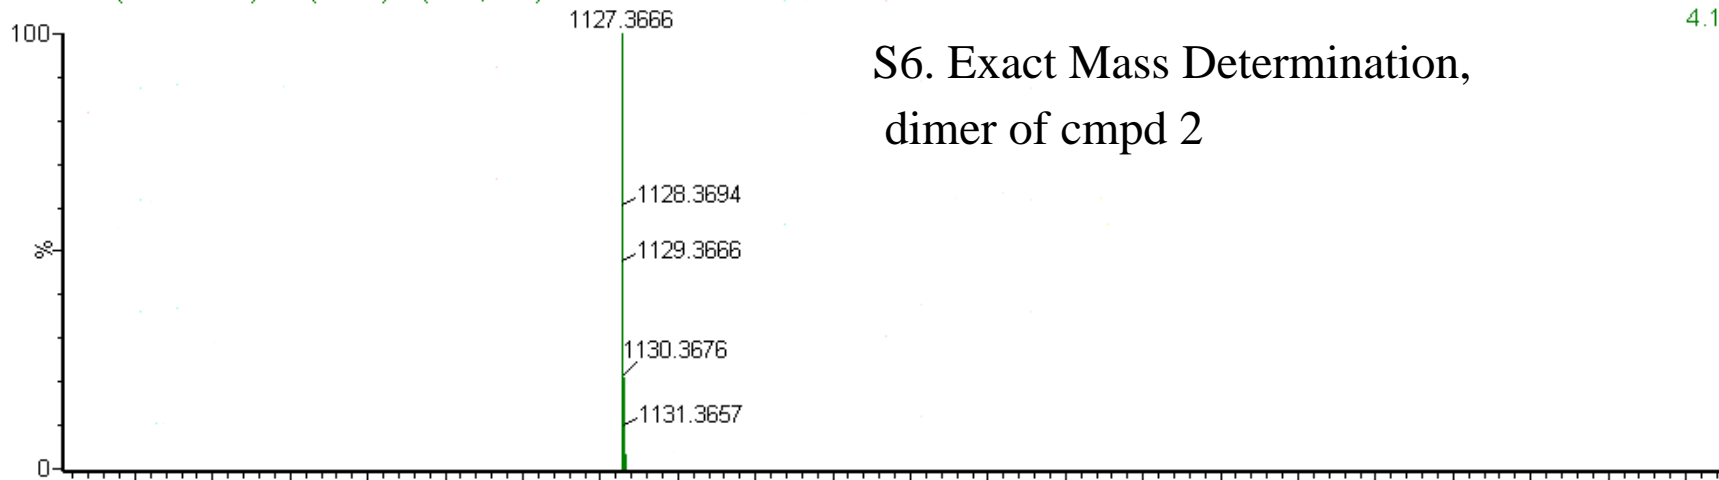

4473-4-D (11 17 2010) T1 477 (5.395) Cm (476:478)

1: TOF MS ES+  
7.44e4

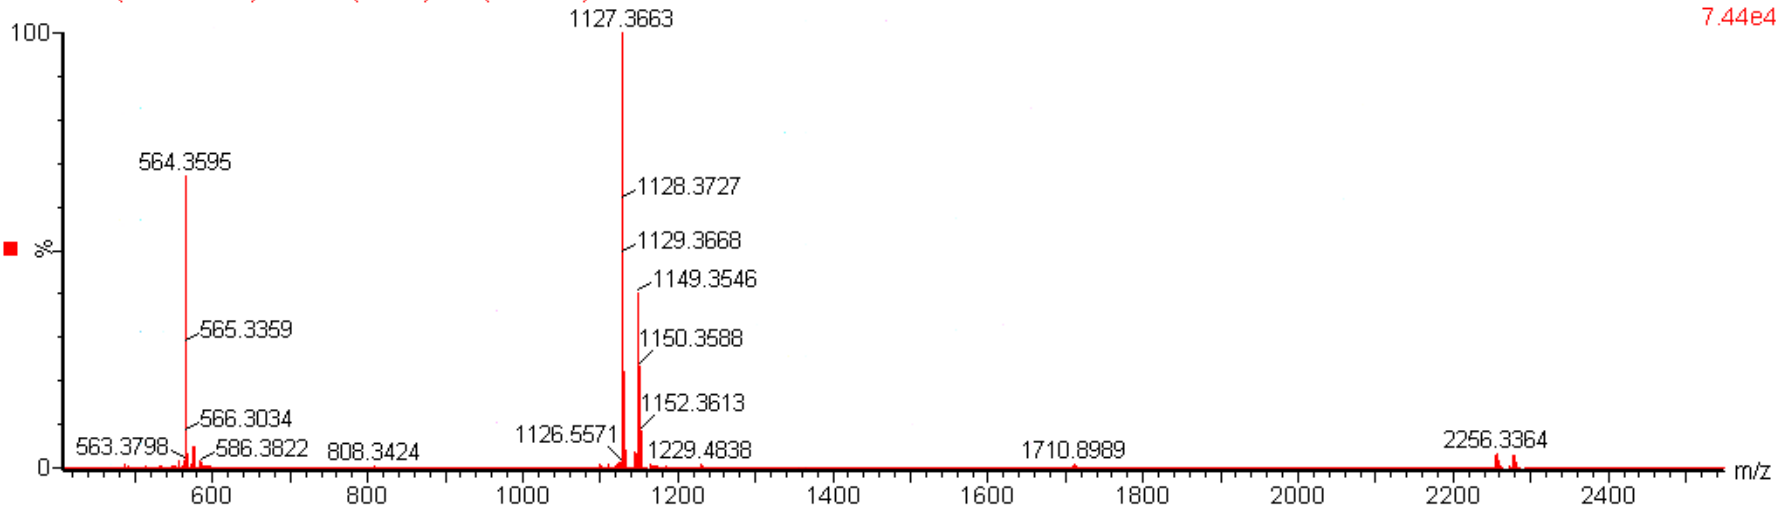

4466-54-K  
pjk679  
1.5mg 90%cdcl3-10%cd3od

# S7.

## <sup>1</sup>H NMR - compd 2

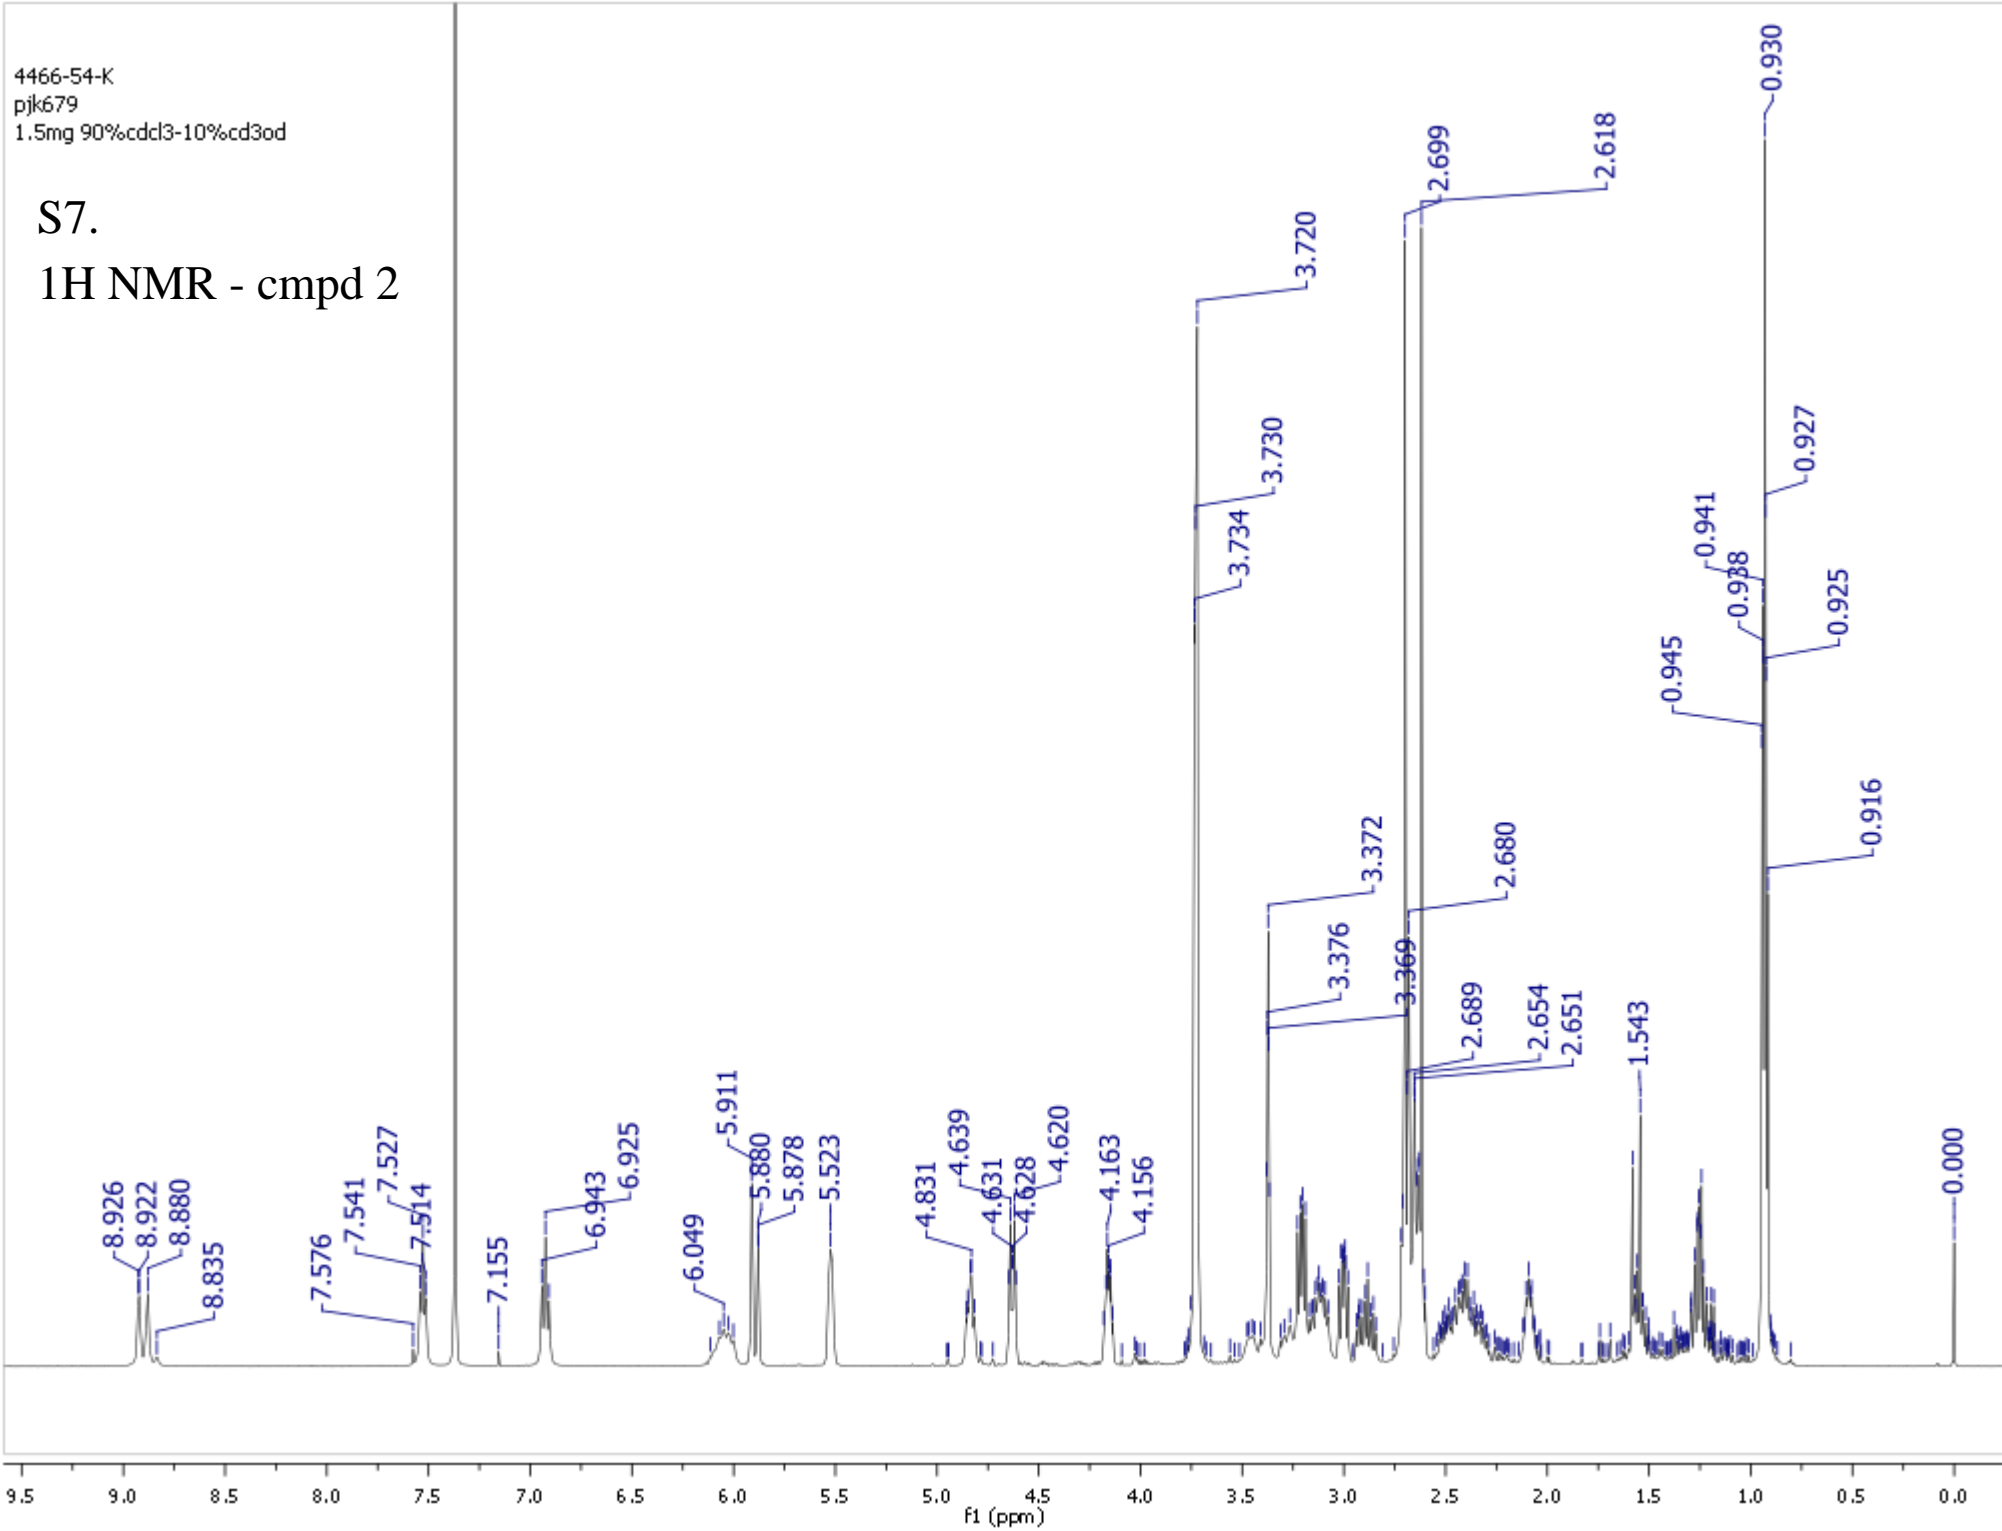

S8.

COSY NMR - compd 2

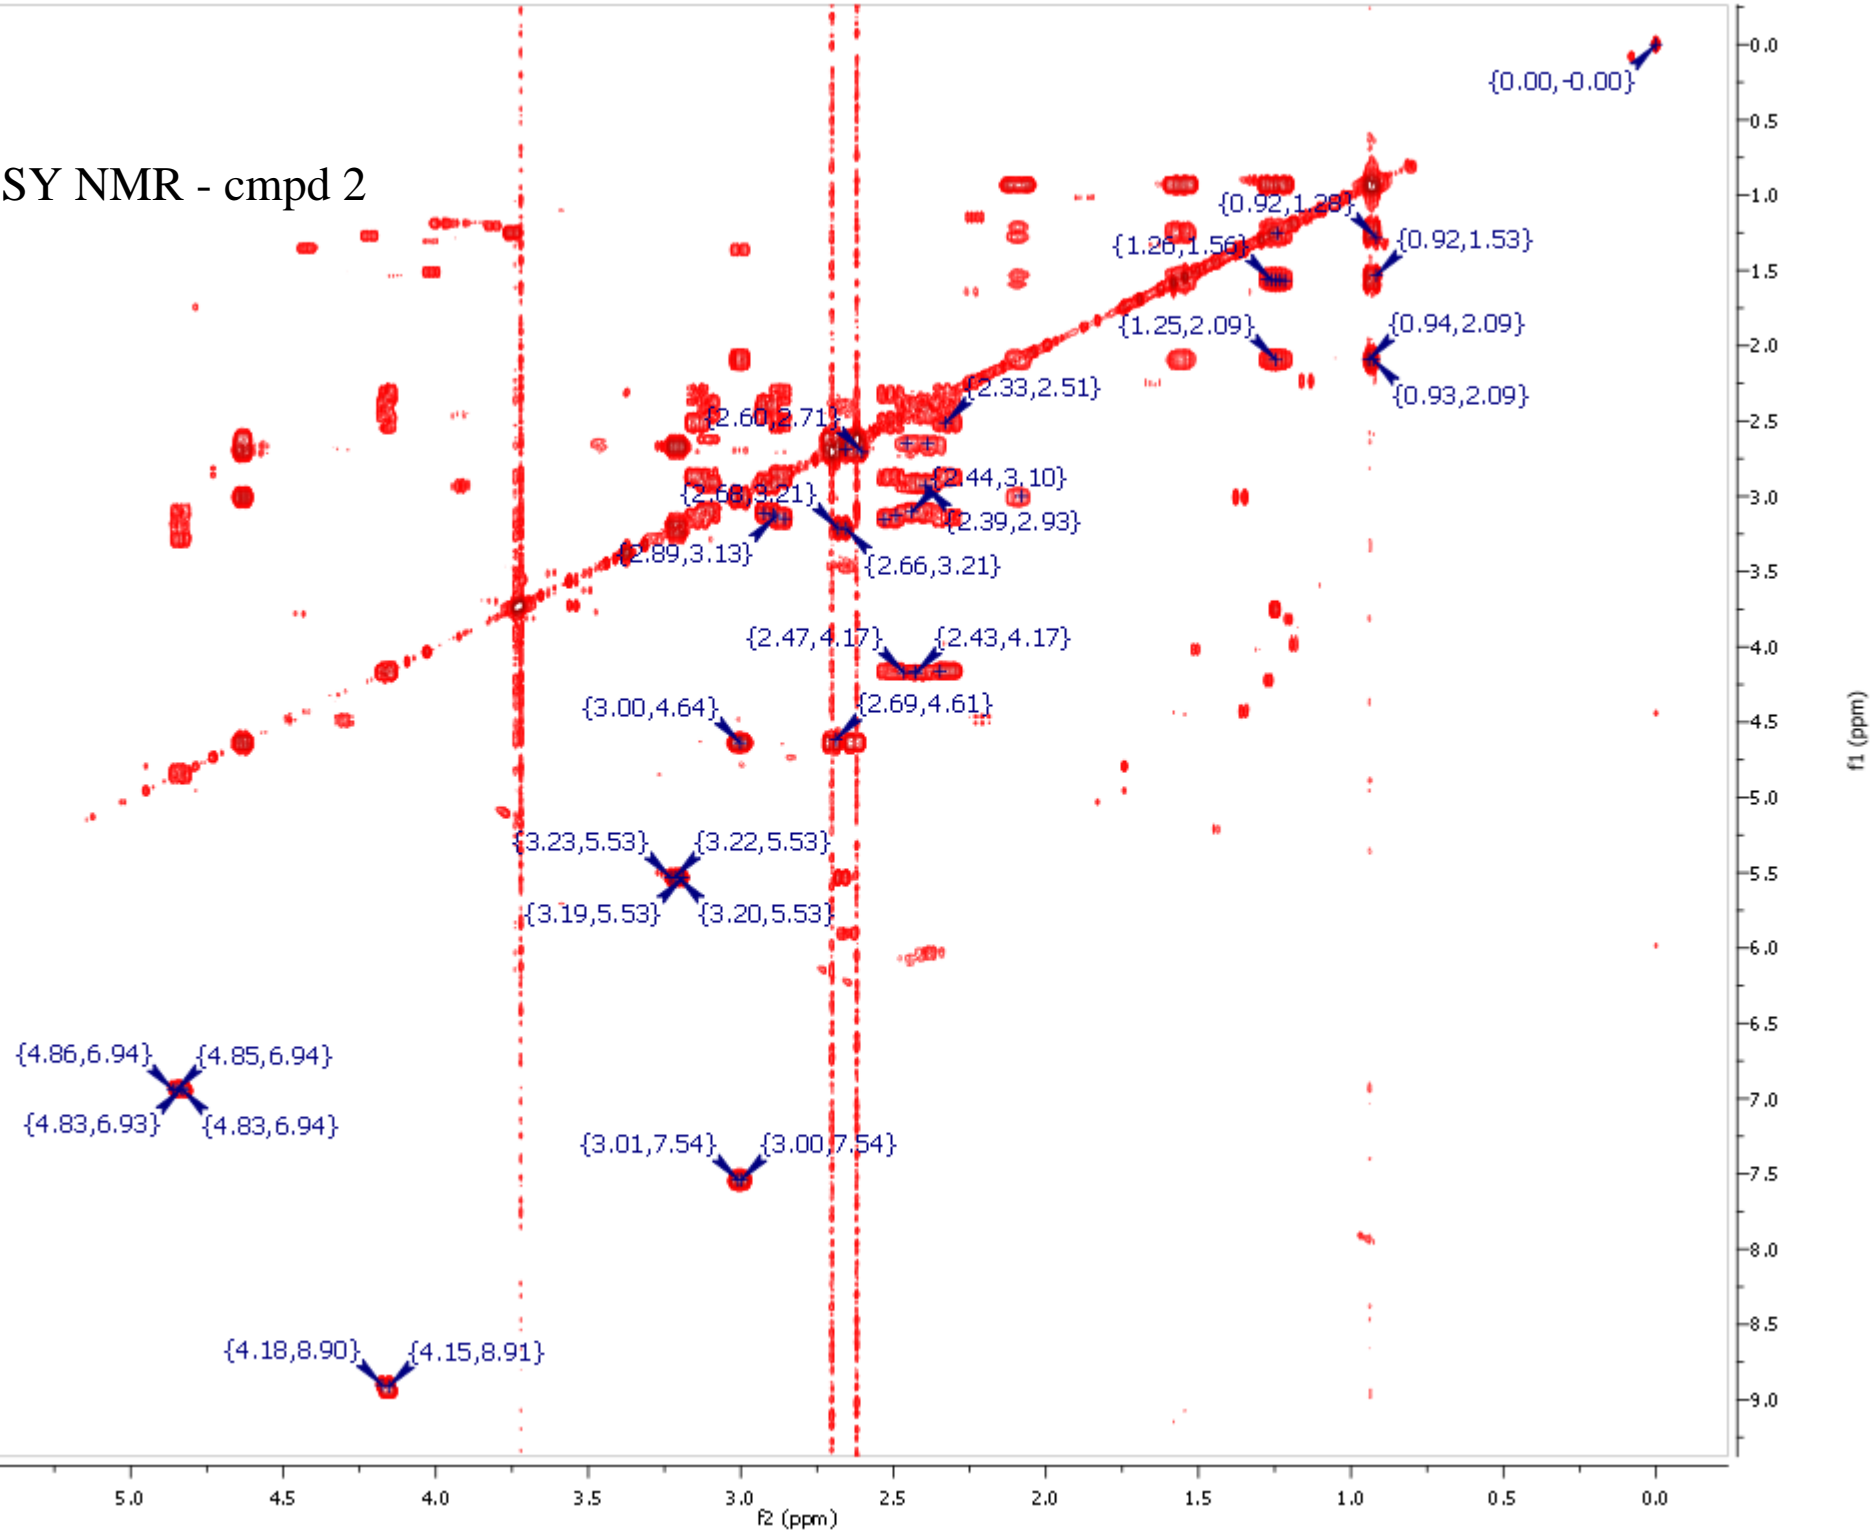



4466-54-K  
pjk678  
1.5mg 90%cdcl3-10%cd3od  
presat\_gC13hsqcse

## S9. HSQC NMR - compd 2

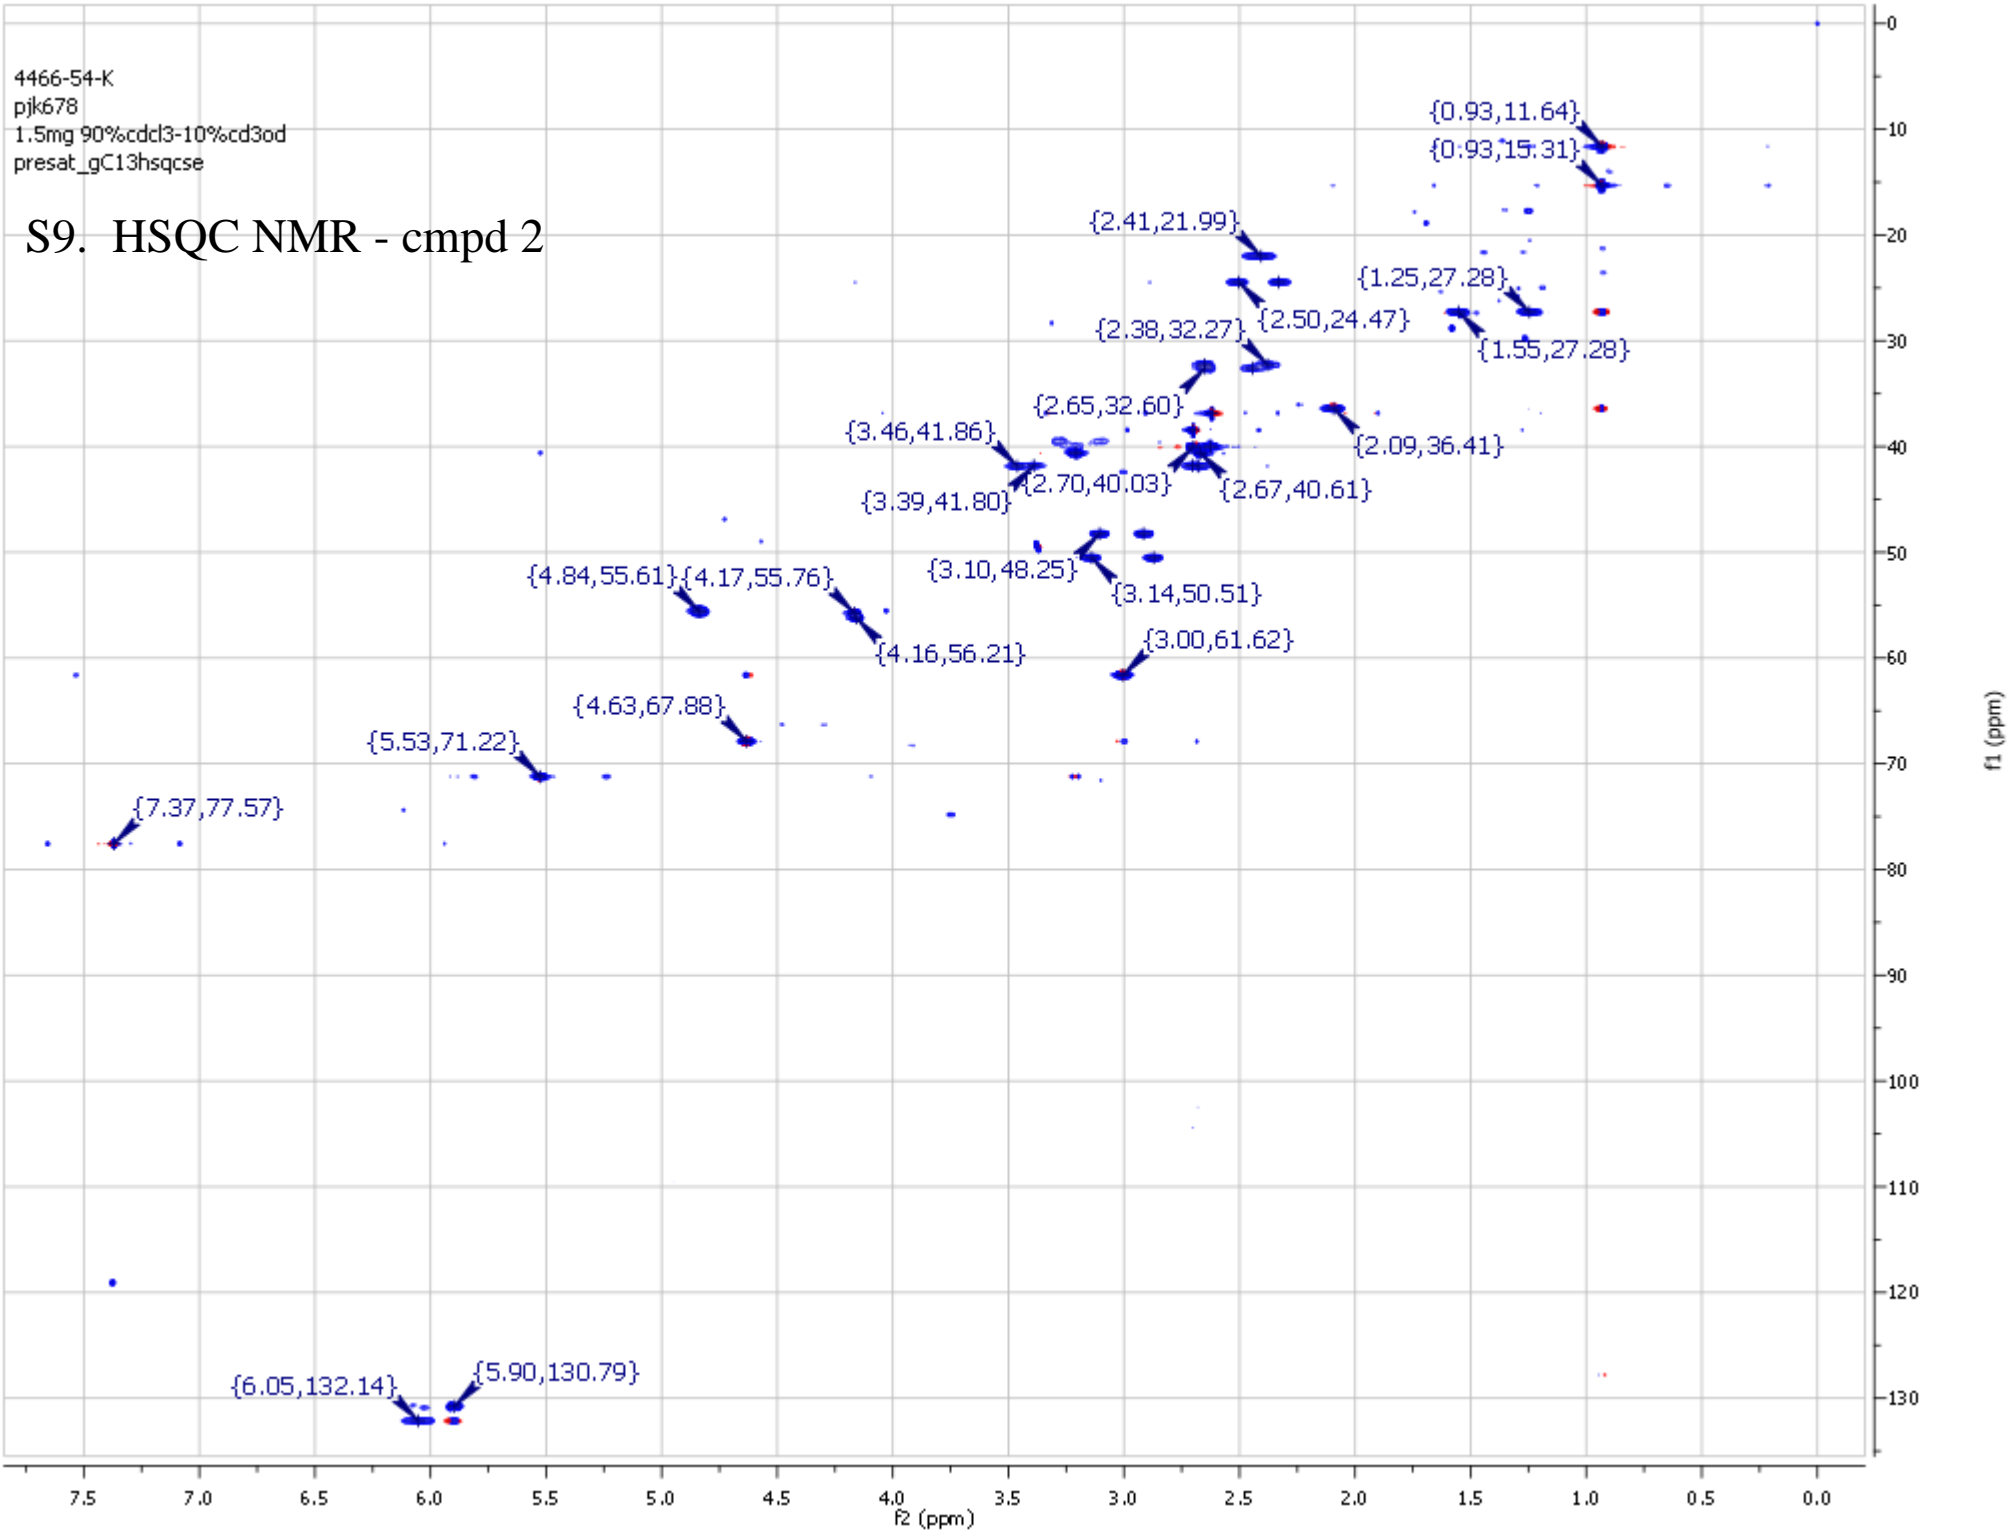

# S10. HMBC NMR - compd 2

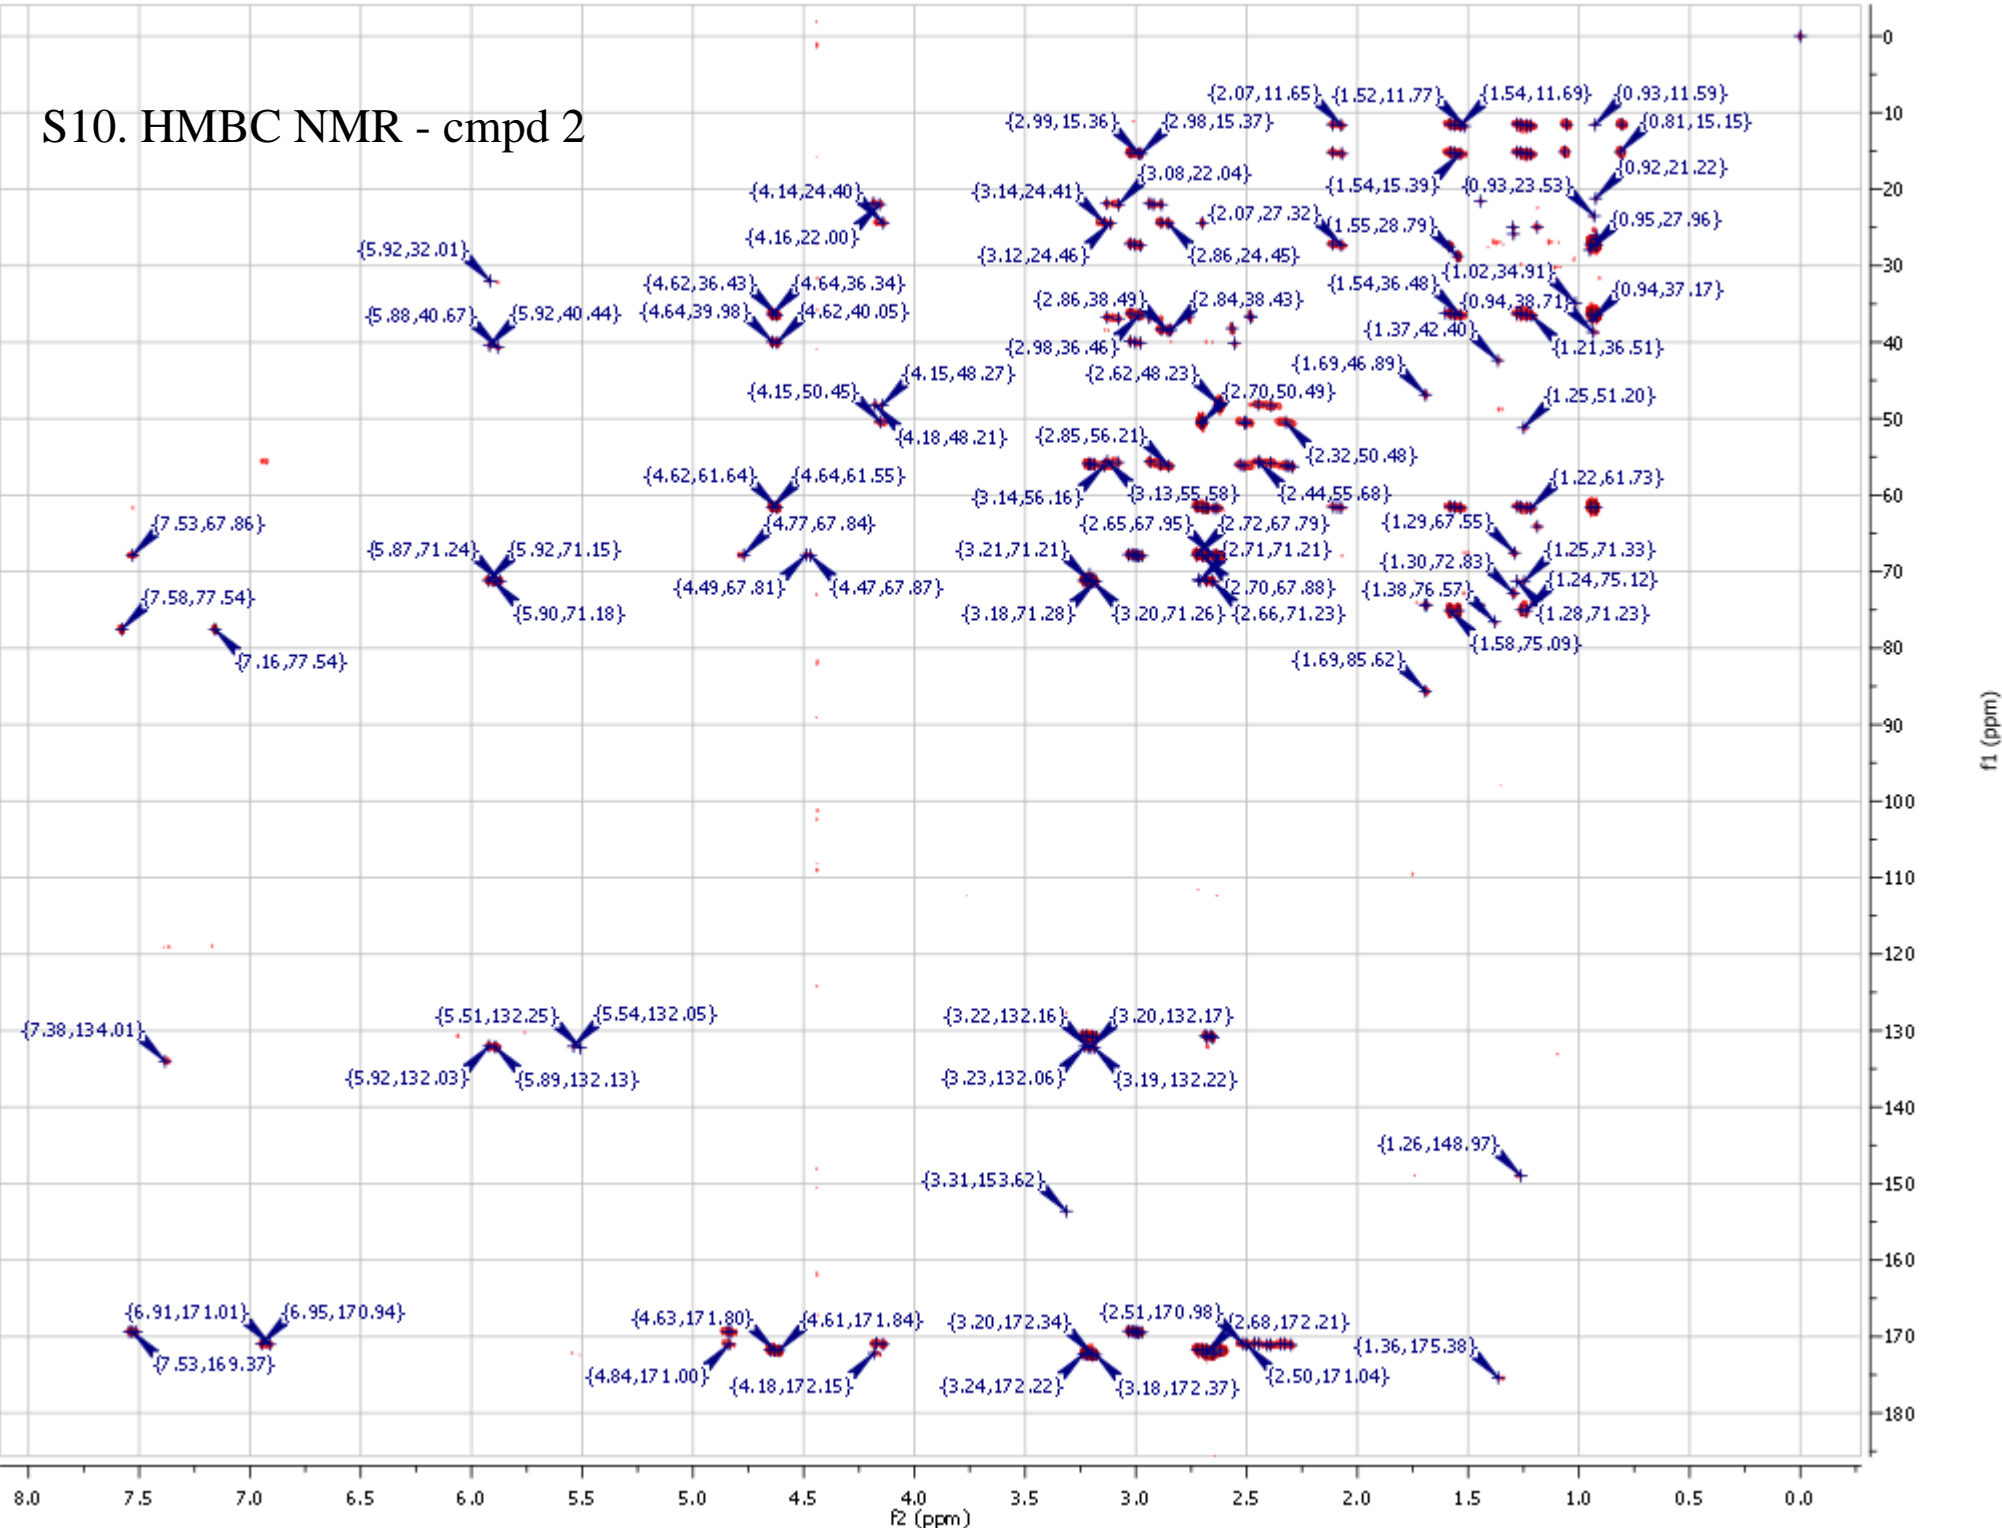

4466-54-K  
pjk681  
1.5mg 90%cdcl3-10%cd3od  
zqftocsy\_dipsi2\_qnv2b

### S11. TOCSY NMR - cmpd 2

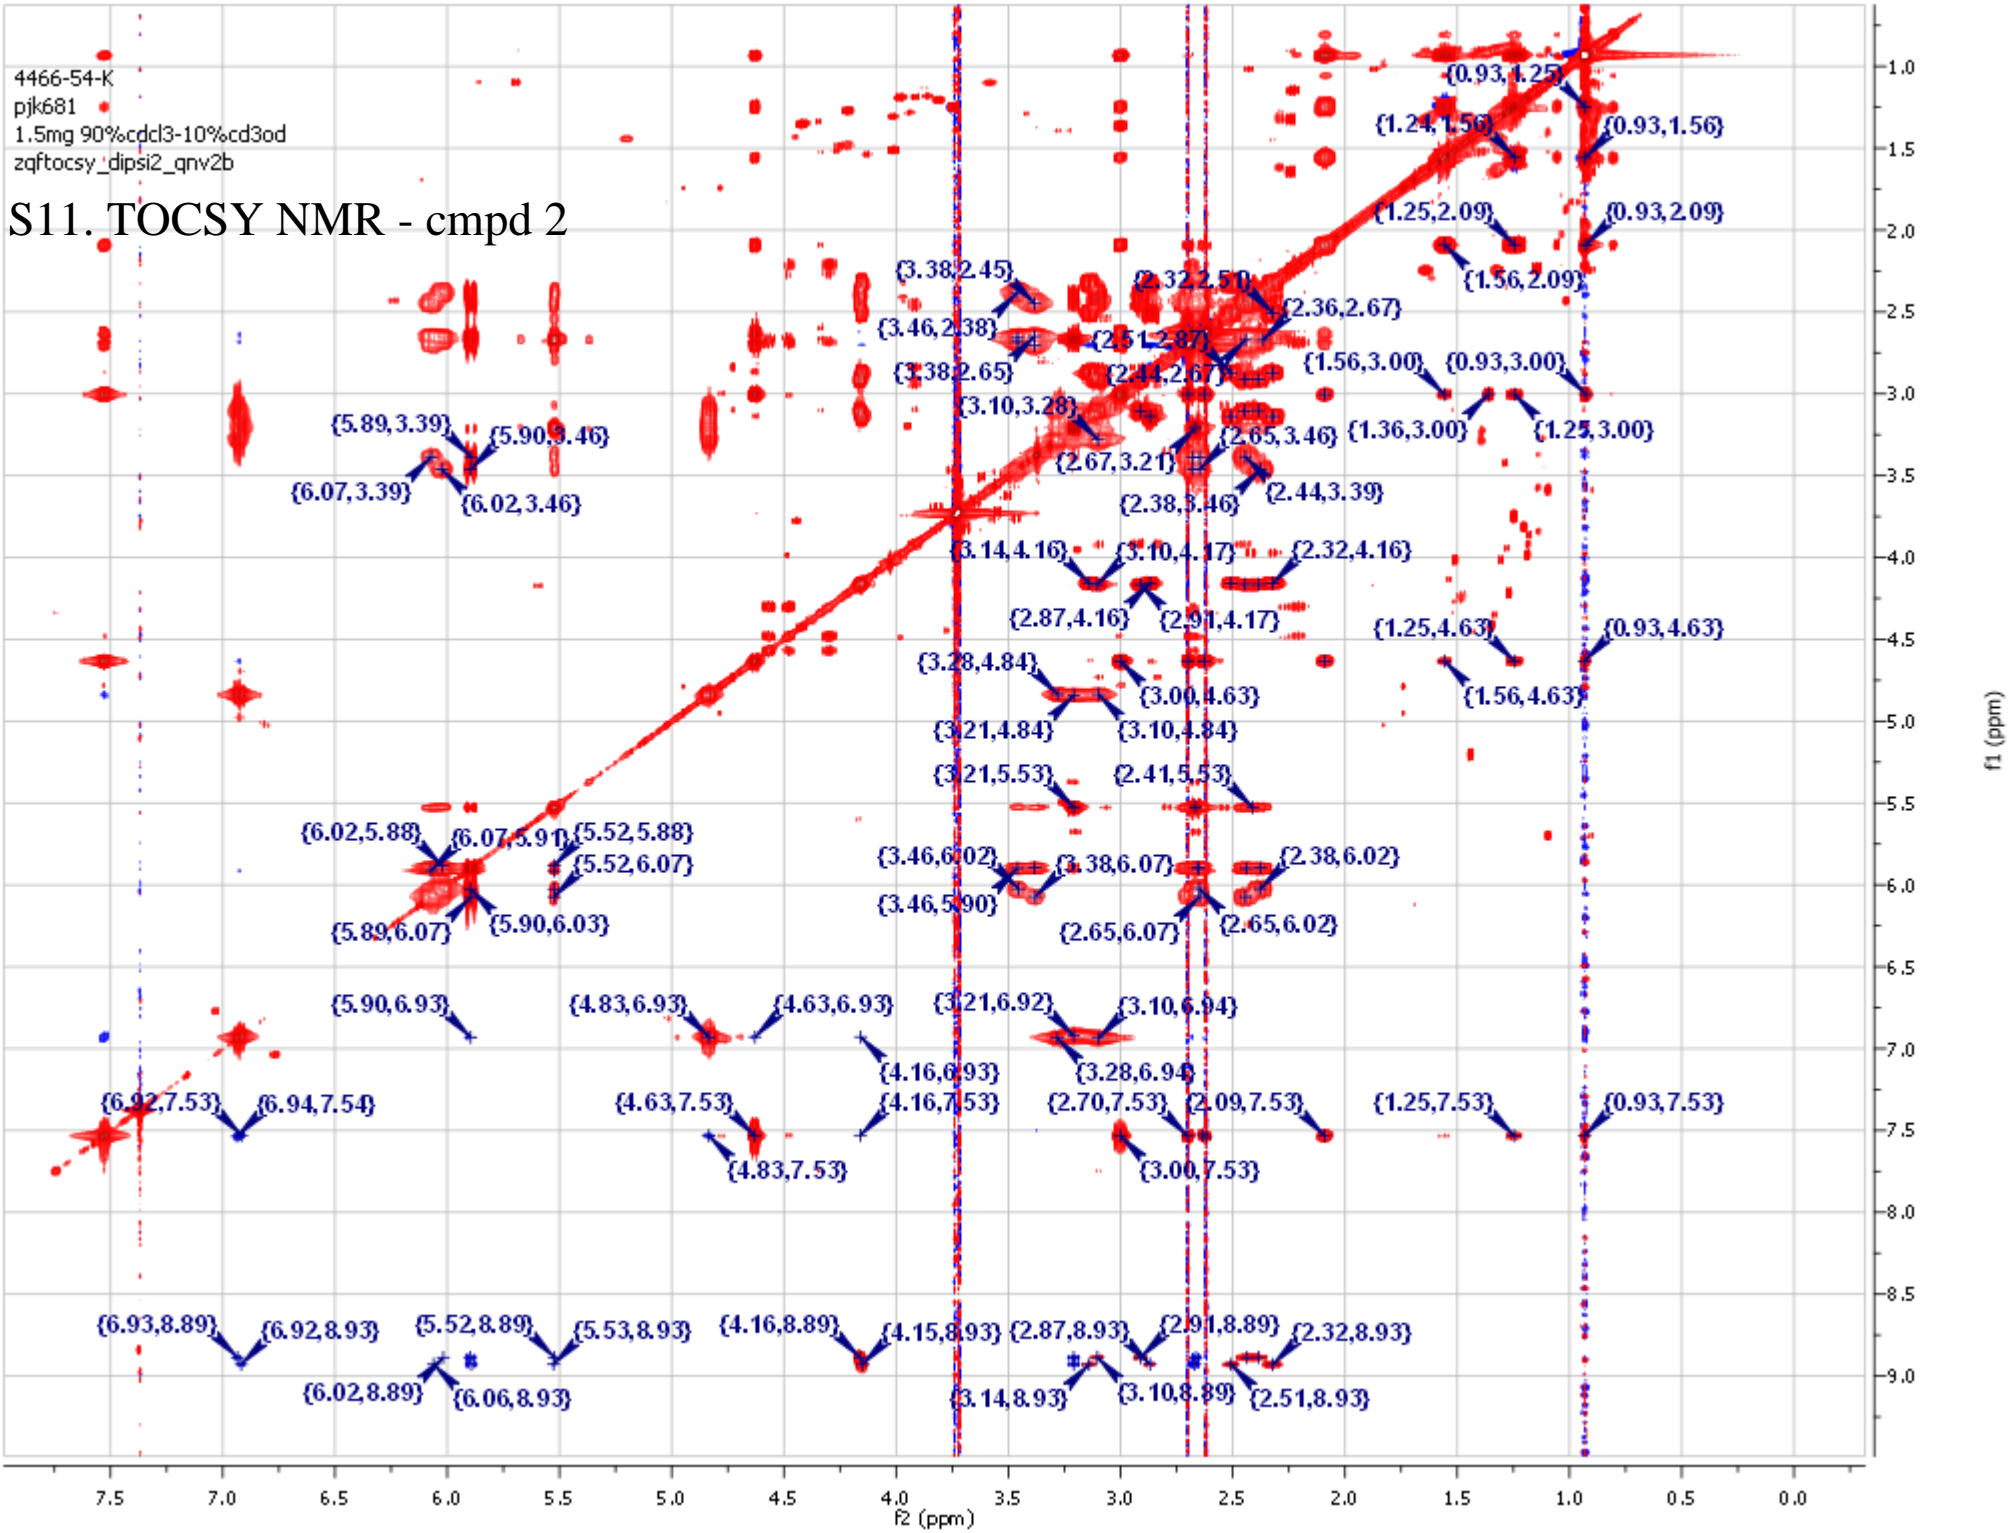

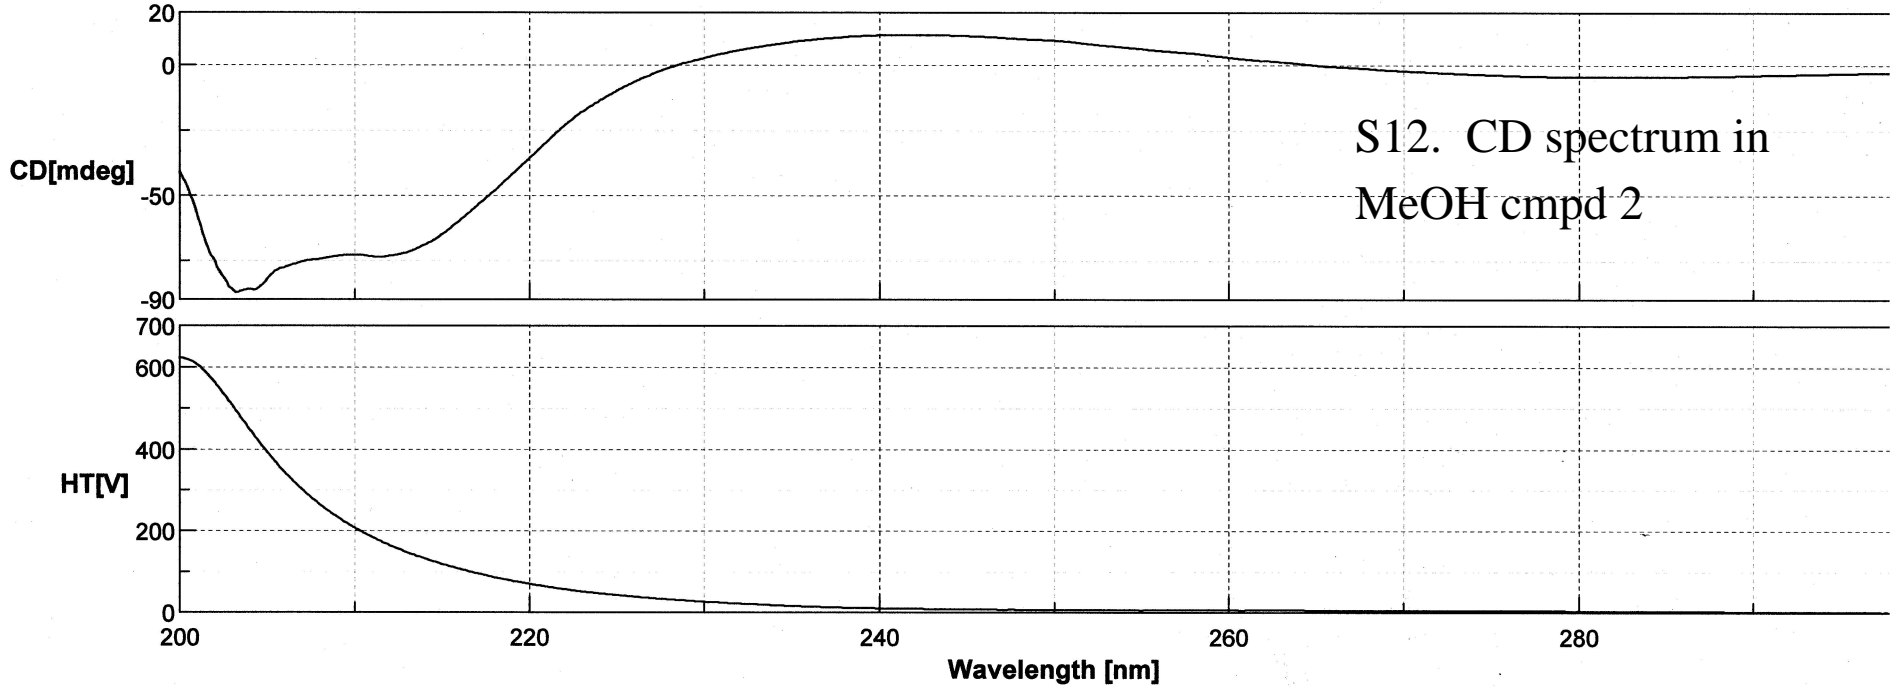

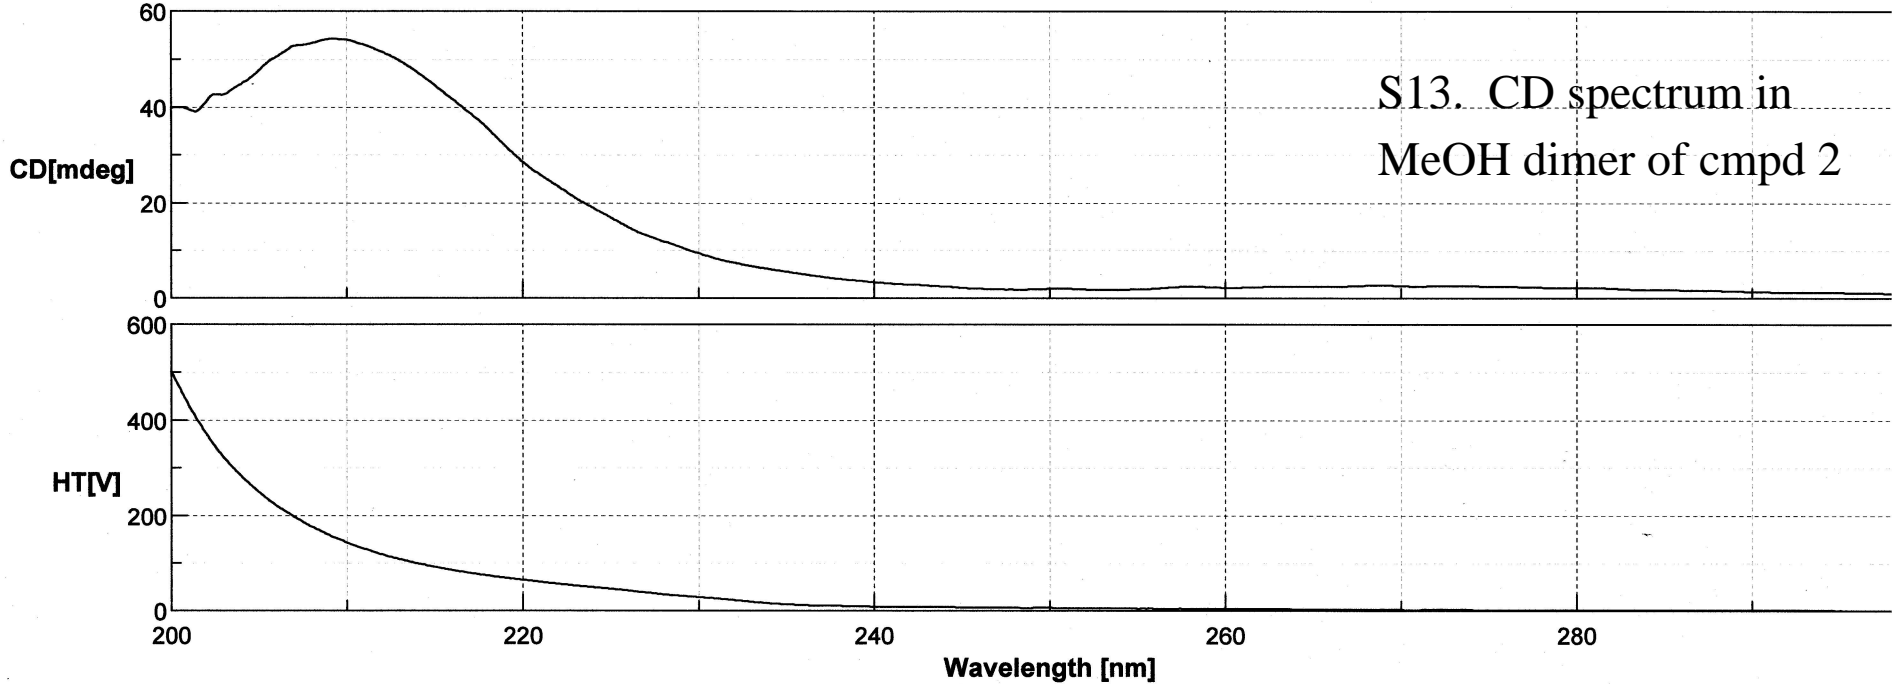

S14. CD spectrum in MeOH

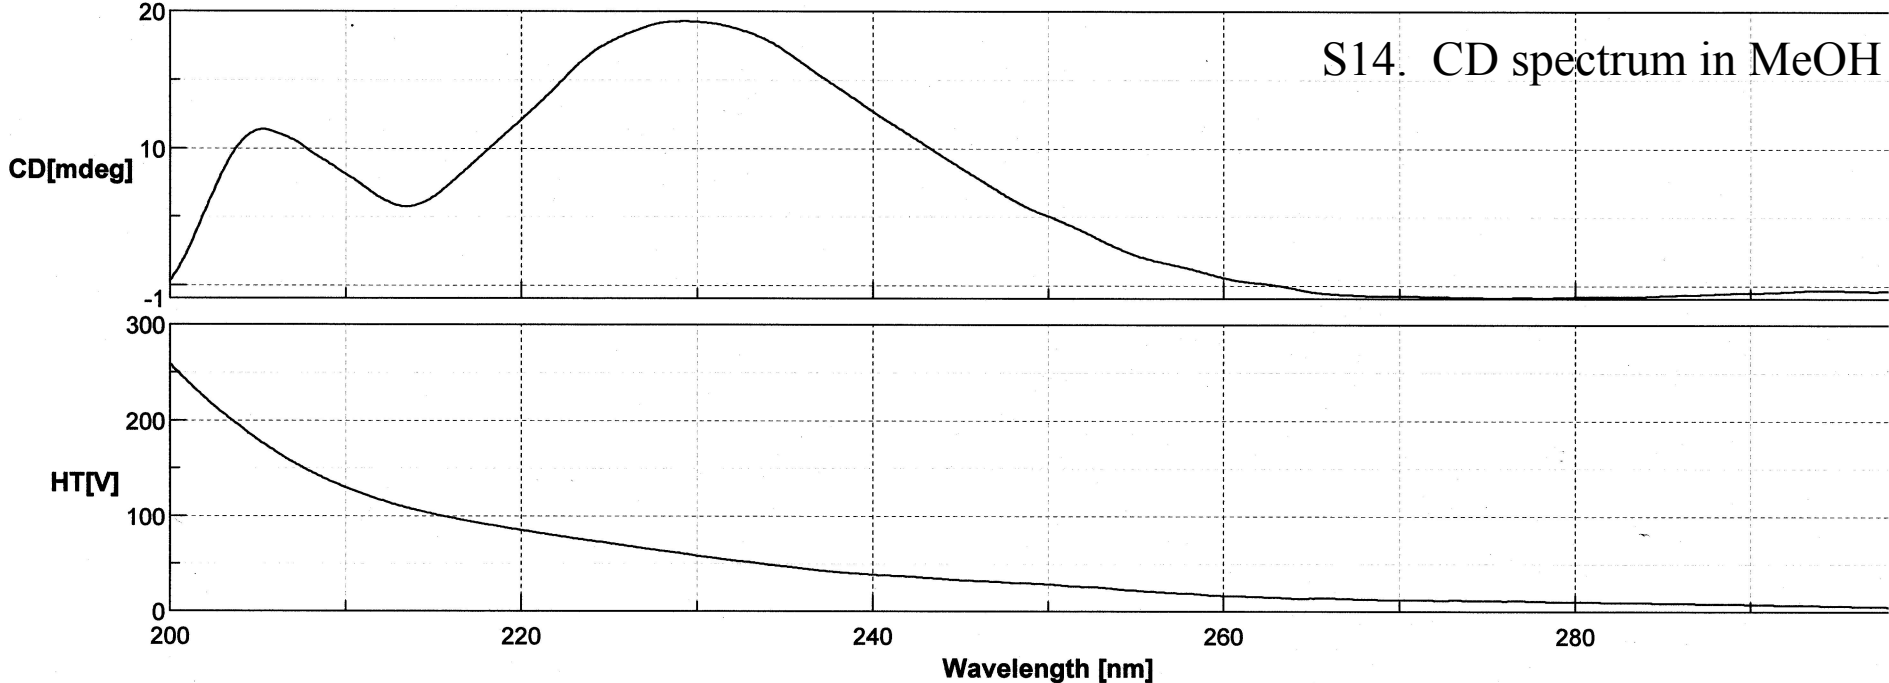

S15. NMR assignments  
Compound 2

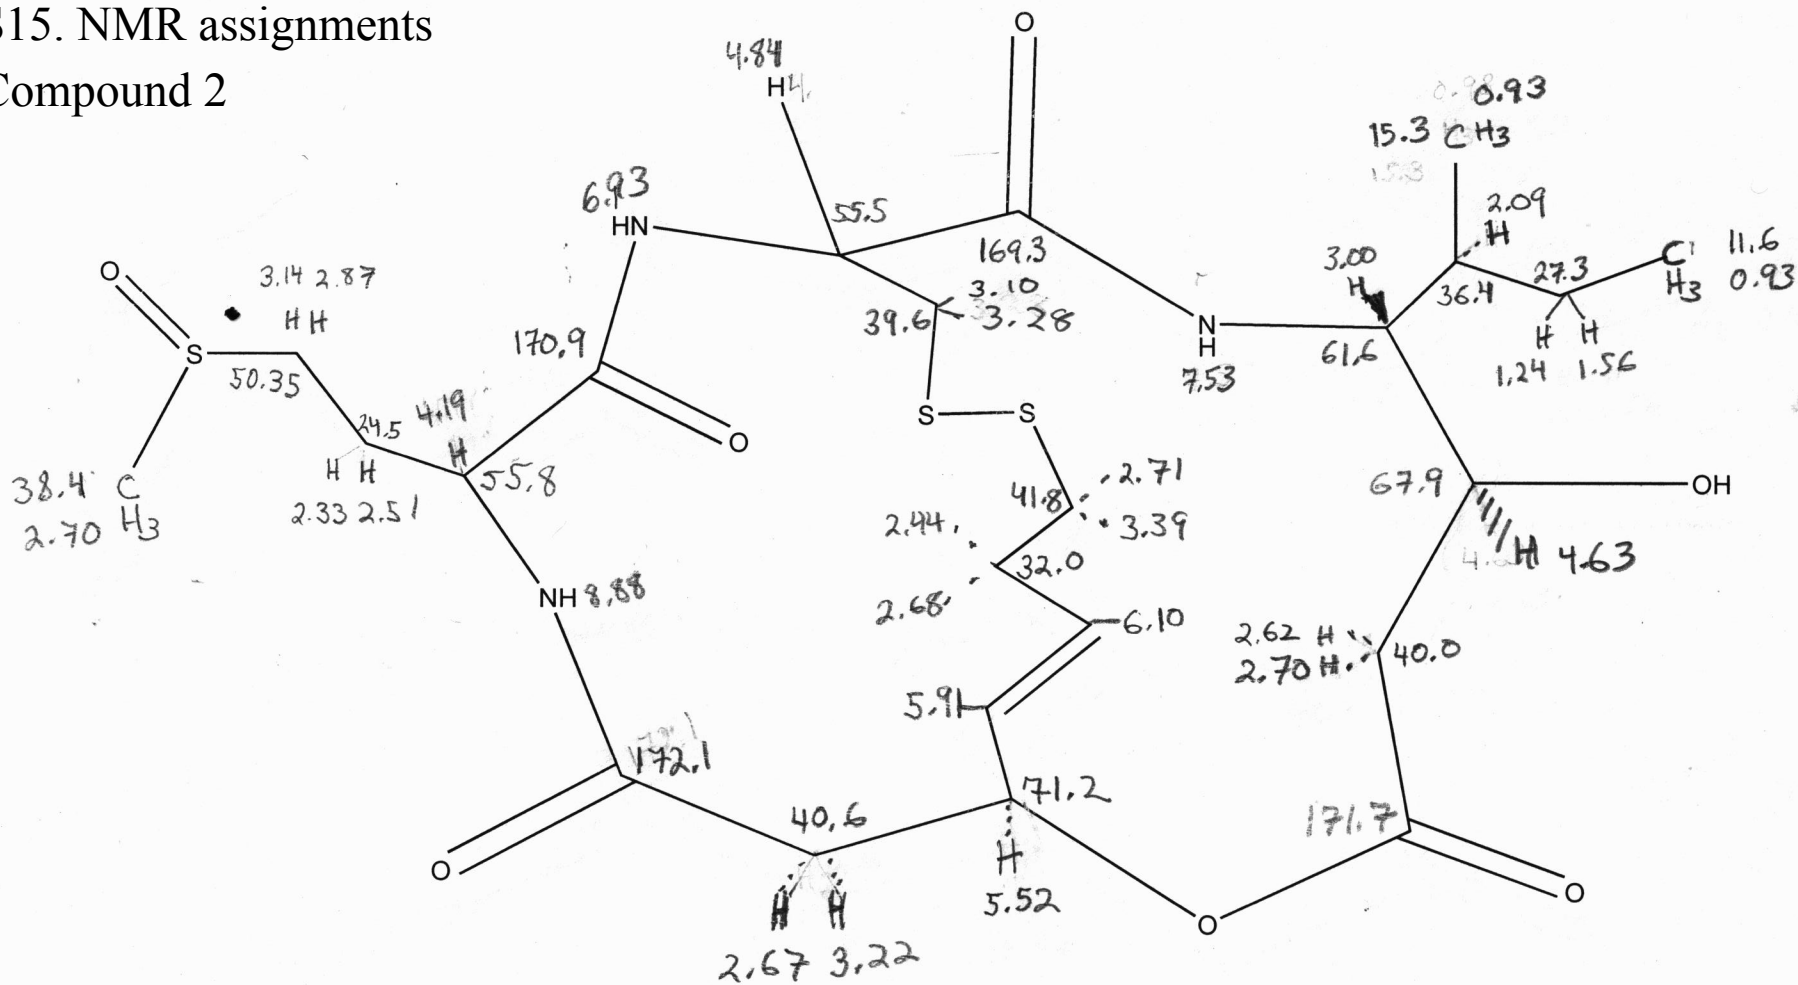

# S16. Comparative HILIC HPLC

Spiruchostatin C MW 563

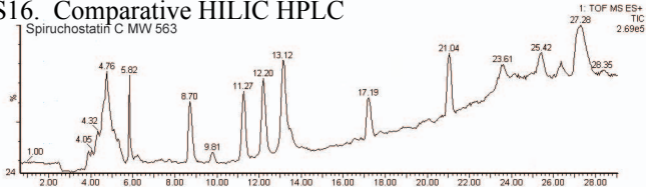

Dimer of Spiruchostatin C, MW 1126

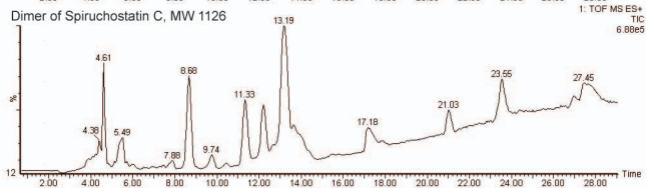



S17.

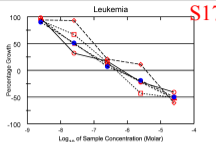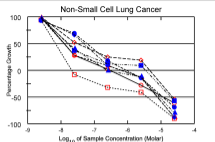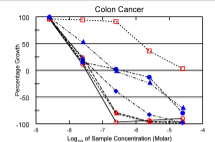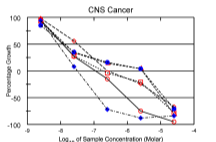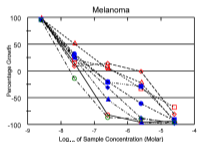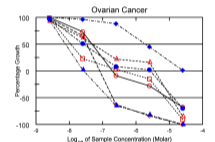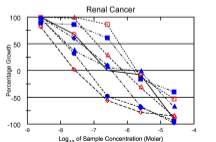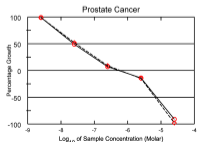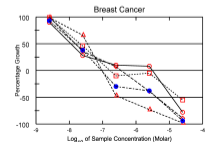

## Leukemia

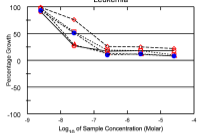

CCRF-CEM  
MOLT-4  
HL-60(TB)  
SR  
K-562

## Non-Small Cell Lung Cancer

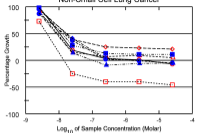

A549/ATCC  
HOP-82  
NCI-H322M  
EKVX  
NCI-H226  
NCI-H460  
HOP-62  
NCI-H23  
NCI-H223

## Colon Cancer

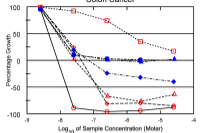

COLO 205  
HCT-15  
SW-620  
HCC-2998  
HT29  
HCT-116  
KM12

## CNS Cancer

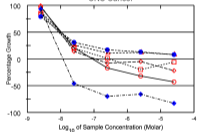

SF-298  
SNB-19  
SF-295  
SNB-75  
SF-539  
U251

## Melanoma

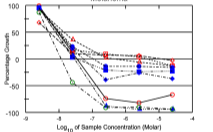

LOX IMVI  
MALME-3M  
M14  
MDA-MB-435  
SK-MEL-2  
SK-MEL-28  
SK-MEL-5  
UACC-257  
UACC-62  
SK-MEL-3

## Ovarian Cancer

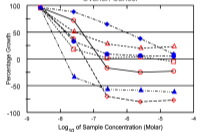

IGROV1  
OVCAR-3  
OVCAR-4  
OVCAR-5  
OVCAR-8  
NCIADR-RES  
SK-OV-3

## Renal Cancer

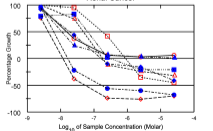

786-O  
CAKI-1  
TK-10  
A498  
RXF 383  
RXF 383  
UO-31  
ACHN  
SN12C

## Prostate Cancer

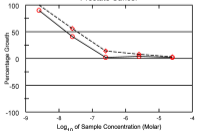

PC-3  
DU-145

## Breast Cancer

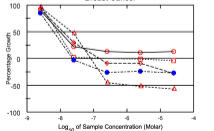

MCF7  
T-47D  
MDA-MB-231  
MDA-MB-468  
BT-649

Melanoma

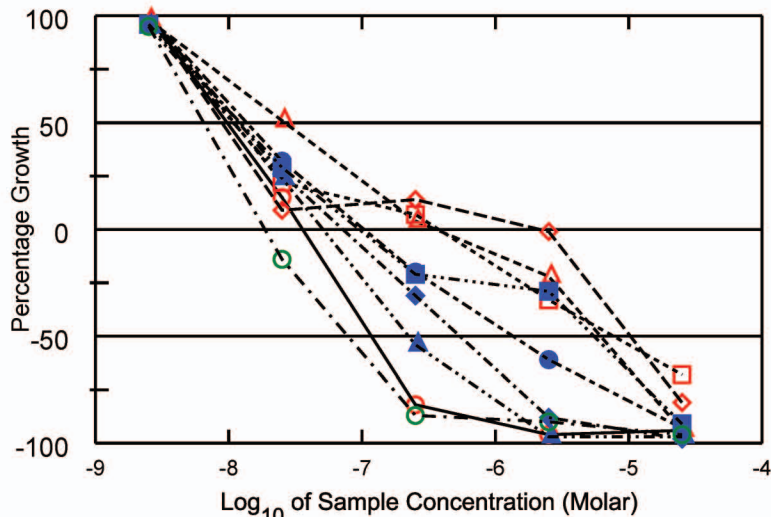

S19.  
FK 228

Ovarian Cancer

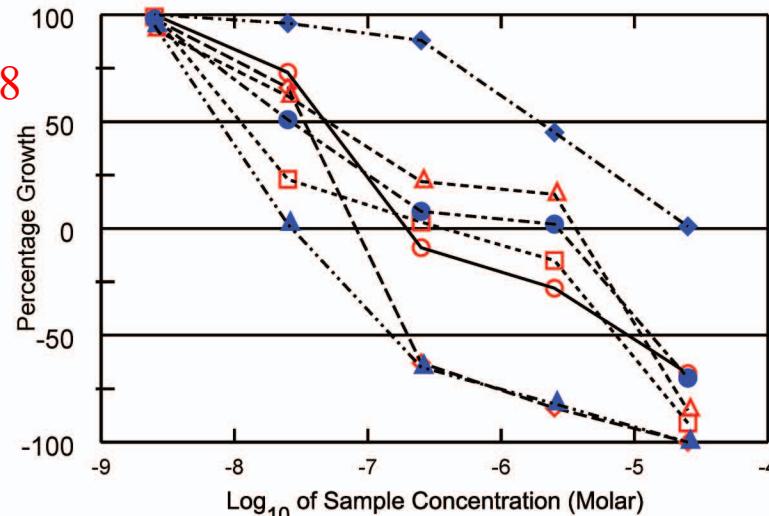

Renal Cancer

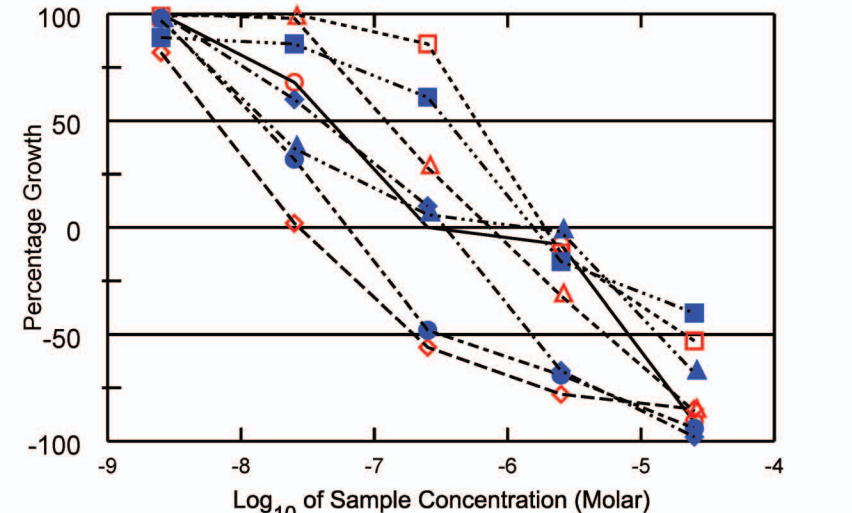

Melanoma

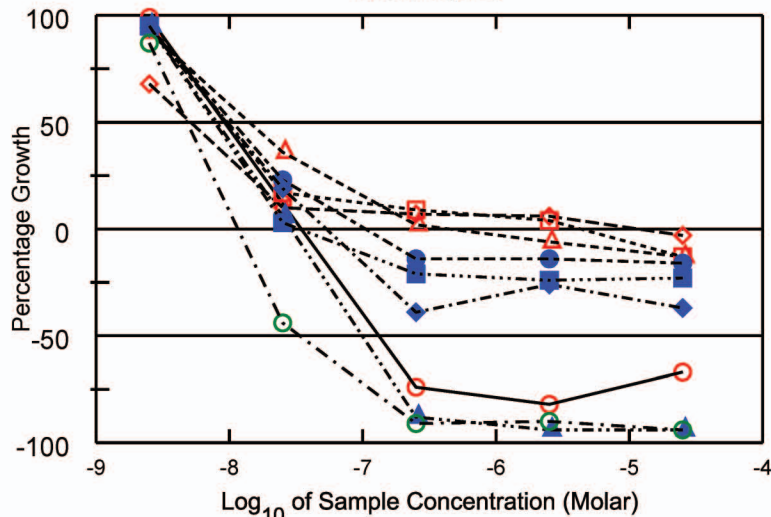

compd 2

Ovarian Cancer

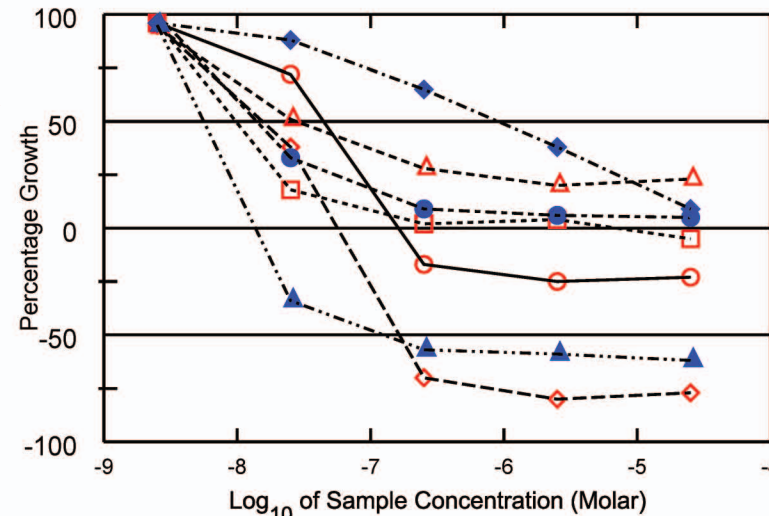

Renal Cancer

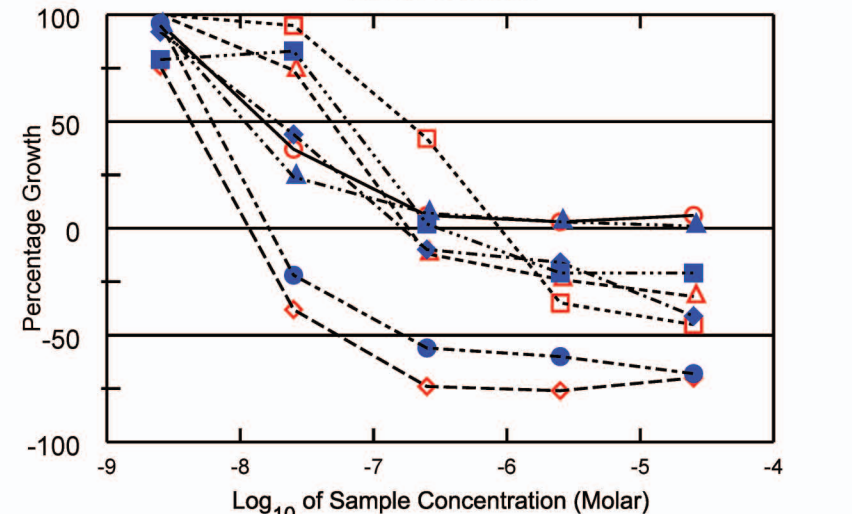

**S20. *In vivo* Hollow Fiber Results for Spiruchostatin C (2) and FK228 (1).**

a. Tumor cells implanted intraperitoneally.

|                     |            | Tumor Cell Growth (%T/C) |       |         |       |
|---------------------|------------|--------------------------|-------|---------|-------|
|                     |            | Spir. C                  | FK228 | Spir. C | FK228 |
| Tumor Cell Panel    | Cell Line  | 2.4 <sup>a</sup>         | 2.4   | 1.6     | 1.6   |
| Breast              | MDA-MB-231 | 41                       | 26    | 43      | 23    |
| CNS                 | SF-295     | >100                     | 48    | >100    | 57    |
| CNS                 | U251       | 91                       | 26    | 76      | 37    |
| Colon               | COLO 205   | 77                       | 46    | 73      | 46    |
| Colon               | SW-620     | 84                       | 55    | 89      | 63    |
| Melanoma            | LOX IMVI   | 45                       | 10    | 22      | 9     |
| Melanoma            | MDA-MB-435 | 78                       | 51    | 82      | 59    |
| Melanoma            | UACC-62    | 50                       | 26    | 65      | 29    |
| Non-Small Cell Lung | NCI-H23    | 92                       | 71    | 80      | 64    |
| Non-Small Cell Lung | NCI-H522   | 45                       | 20    | 46      | 50    |
| Ovarian             | OVCAR-3    | 66                       | 47    | 86      | 49    |
| Ovarian             | OVCAR-5    | 95                       | 42    | 90      | 35    |

<sup>a</sup> amount of drug administered in units of mg/kg/dose

b. Tumor cells implanted subcutaneously

|                     |            | Tumor Cell Growth (%T/C) |       |         |       |
|---------------------|------------|--------------------------|-------|---------|-------|
|                     |            | Spir. C                  | FK228 | Spir. C | FK228 |
| Tumor Cell Panel    | Cell Line  | 2.4 <sup>a</sup>         | 2.4   | 1.6     | 1.6   |
| Breast              | MDA-MB-231 | >100                     | >100  | 95      | 76    |
| CNS                 | SF-295     | >100                     | >100  | 100     | >100  |
| CNS                 | U251       | >100                     | >100  | >100    | >100  |
| Colon               | COLO 205   | 87                       | >100  | 81      | 84    |
| Colon               | SW-620     | 80                       | 88    | 77      | 77    |
| Melanoma            | LOX IMVI   | 89                       | 84    | 76      | 86    |
| Melanoma            | MDA-MB-435 | >100                     | >100  | 86      | >100  |
| Melanoma            | UACC-62    | 79                       | 83    | 79      | 85    |
| Non-Small Cell Lung | NCI-H23    | 86                       | 92    | 65      | 73    |
| Non-Small Cell Lung | NCI-H522   | 92                       | 94    | 95      | 92    |
| Ovarian             | OVCAR-3    | 56                       | 90    | 71      | 76    |
| Ovarian             | OVCAR-5    | >100                     | 100   | >100    | >100  |

<sup>a</sup> amount of drug administered in units of mg/kg/dose
